# Supplementary material for: In situ preparation of a nickel-oxy-hydroxide decorated ITQ-2 composite: a hydrodeoxygenation catalyst
Source: Royal Society of Chemistry journal article supplement (doi:10.1039/d3cc05427f), 2024-01-01
Supplement: d3cc05427f1.pdf [file d3cc05427f1.pdf]

1 **Electronic Supplementary Information (ESI):**

2

3

4 ***In-situ* Preparation of Nickel-oxy-hydroxide Decorated ITQ-2 Composite: A**  
5 **Hydrodeoxygenation Catalyst**

6 *Naroth P. Nimisha, Soumya B. Narendranath, Ayyamperumal Sakthivel \**

7

8

9 *Inorganic Materials & Heterogeneous Catalysis Laboratory, Department of Chemistry,*  
10 *School of Physical Sciences, Sabarmati Building, Tejawini Hills,*  
11 *Central University of Kerala, Kasaragod - 671316, Kerala, India.*

12 *\*Email: [sakthiveldu@gmail.com](mailto:sakthiveldu@gmail.com) / [sakthivelcuk@cukerala.ac.in](mailto:sakthivelcuk@cukerala.ac.in)*

13 *ORCID information: <https://orcid.org/0000-0003-2330-5192>*

14

15

16

## 17 Experimental

### 18 Synthesis of MCM-22(P)

19 The MCM-22 with Si/Al = 30 and molar gel composition SiO<sub>2</sub>:0.3 NaOH:0.033 Al<sub>2</sub>O<sub>3</sub>:0.5 HMI:45  
20 H<sub>2</sub>O was synthesised as per the modified procedure reported earlier.<sup>1</sup> A synthesis mixture  
21 containing aluminosilicate gel (colloidal silica; silicon (IV) oxide 50 wt.%, Alfa Aesar; sodium  
22 aluminate; NaAlO<sub>2</sub>, Sigma Aldrich; (Al<sub>2</sub>O<sub>3</sub>): 50–56% and (Na<sub>2</sub>O): 37–45%), NaOH (SRL, 98%),  
23 and the template HMI (98%; Alfa Aesar) was hydrothermally treated for 7 days at 155 °C. After  
24 the crystallisation period, the sample was washed with distilled water and ethanol and dried  
25 overnight at 70 °C to obtain the MCM-22 precursor, MCM-22 (P).

### 26 Preparation of Nickel-oxy-hydroxide Decorated ITQ-2 Composite

27 A slurry comprising 1 g of MCM-22 (P), an equimolar mixture of CTABr (25%, SRL) and  
28 CTAOH (TCI), 40 wt% TPAOH (Tritech), and 60 mL of water was refluxed at 70 °C for 24 hours  
29 with continuous stirring. After the treatment, the slurry was cooled to room temperature. The pH  
30 of the mixture was noted. The mixture was placed in an ultrasound bath (50 W, 40 kHz) for one  
31 hour to force the layers apart. The mixture was labelled MCM-22 (S). The nickel salt, viz., nickel  
32 nitrate hexahydrate (Ni(NO<sub>3</sub>)<sub>2</sub> · 6H<sub>2</sub>O, Loba Chemie), was added (5–20 wt%) *in situ* to MCM-22  
33 (S) with continuous stirring, followed by sonication and further refluxing at appropriate conditions.  
34 The mixture was then cooled to room temperature. The resultant pH was noted. The solid product  
35 was separated by centrifugation, subsequently dried in an air oven, and represented as Ni-ITQ-2  
36 composite. The composition of the precursor mixture, nickel concentration, synthesis conditions  
37 by varying the metal concentration, and pH are listed in Table S1.

38 Table S1. Molar composition and synthesis condition of MCM-22(P) to Ni-ITQ-2 Composite.

|                                                   |                                                                                                                                                                               |
|---------------------------------------------------|-------------------------------------------------------------------------------------------------------------------------------------------------------------------------------|
| MCM-22 (P) composition                            | 1 SiO <sub>2</sub> : 0.0385 Al <sub>2</sub> O <sub>3</sub> : 0.1468 NaOH : 0.353 HMI : 0.04–0.07<br>CTABr <sup>-</sup> /OH <sup>-</sup> : 0.12 TPAOH : 30.5 H <sub>2</sub> O. |
| Nickel concentration (range<br>in mmol and mol %) | 4.6-18 mol % (equivalent to 8.5-34.0 mmol with respect to silica)                                                                                                             |
| pH (range)                                        | 2-13 (pH adjusted using con. HCl; (Fischer Scientific, 35.8 % )                                                                                                               |
| Synthesis Conditions                              | 70 °C, 48 h refluxing and 0.5 h sonication                                                                                                                                    |

39 For comparison, swollen MCM-22 (P) was delaminated by sonication in the absence of nickel  
40 oxy-hydroxide, with and without pH adjustment, and was labelled ITQ-2 and MS-1, respectively.

41 Similarly, pure nickel oxy-hydroxide was synthesised under the same conditions and represented  
42 as NiO(OH).

43 The post-synthetic nickel-loaded MCM-22 and ITQ-2 samples were prepared by using nickel  
44 nitrate hexahydrate ( $\text{Ni}(\text{NO}_3)_2 \cdot 6\text{H}_2\text{O}$ ) as the nickel source. In order to prepare 20 wt.% Ni-loaded  
45 samples, initially a  $\text{Ni}(\text{NO}_3)_2 \cdot 6\text{H}_2\text{O}$  solution is prepared by dissolving it in distilled water. The  
46 resultant  $\text{Ni}(\text{NO}_3)_2 \cdot 6\text{H}_2\text{O}$  solution was uniformly introduced into MCM-22 and ITQ-2 samples  
47 evenly spread on petri dishes by the incipient wetness method. Then the samples were kept  
48 overnight at room temperature for drying. Ni-loaded MCM-22 and ITQ-2 catalysts were calcined  
49 at 400 °C for 6 hours ( $2^\circ/\text{min}$ ), and the resultant samples were labelled Ni-MCM-22 and ITQ-2-  
50 Ni-W, respectively. The physical mixture was synthesised by simply grinding ITQ-2 and nickel  
51 oxy-hydroxide and labelled as ITQ-2-Ni-P.

## 52 **Characterization**

53 The powder XRD diffraction patterns were recorded using a D8 Advance (Bruker) X-ray  
54 diffractometer with Cu-K $\alpha$  radiation ( $\lambda=1.54059 \text{ \AA}$ ) in a  $2\theta$  range of 5–80°, a scan speed of 3°  
55  $\text{min}^{-1}$ , and a step size of 0.02. FTIR spectra were recorded on a JASCO-FT/IR 4700 FTIR  
56 spectrophotometer. Spectra were collected with a resolution of 4  $\text{cm}^{-1}$  and 60 scans in the mid-IR  
57 (400–4000  $\text{cm}^{-1}$ ) region. Brunauer-Emmett-Teller (BET) surface area and  $\text{N}_2$  adsorption-  
58 desorption of the samples were determined at –196 °C by an automatic micropore physisorption  
59 analyzer (Micromeritics ASAP 2020, USA) after the samples were degassed at 250 °C for 10 h.  
60 The BET surface area was calculated in the relative pressure range 0–0.1 over the adsorption  
61 branch of the isotherm. Barrette-Joyner-Halenda (BJH) pore size distribution was obtained from  
62 the desorption branch of the isotherm. Other textural properties, like pore volume, were elucidated  
63 from the isotherm data. The acid properties of H-type zeolites were obtained by temperature-  
64 programmed desorption of ammonia ( $\text{NH}_3$ -TPD) analysis using a BELCAT-M (Japan) TPD  
65 instrument equipped with a thermal conductivity detector (TCD). The sample was preheated in a  
66 quartz reactor at 400 °C for 30 minutes in a He flow. The ammonia was adsorbed at 50 °C for 30  
67 min. Ammonia desorption was carried out at 50 °C for 15 minutes to remove any physisorbed  
68 ammonia. TPD of ammonia was performed from 50 to 900 °C at a heating rate of 10 °C/min in a  
69 helium flow of 30 mL/min. A plot of the TCD signal versus temperature obtained was used to  
70 determine the number of acidic sites and their strength. The pyridine FT-IR spectrum was recorded  
71 using a Nicolet iS50 FTIR spectrometer (Thermo Fisher Scientific). The samples were pressed  
72 into a self-supporting wafer and pre-activated at 400 °C. The background spectrum was recorded

73 first after cooling the sample to room temperature. The pyridine was adsorbed on the samples at  
74 room temperature and allowed to saturate for 30 min. The pyridine desorption was performed from  
75 50 to 350 °C. The FTIR spectrum was recorded and analysed for Brönsted and Lewis acidic sites.  
76 The morphologies of the samples were examined by a VEGA3 TESCAN-scanning electron  
77 microscope. High-resolution transmission electron microscopy (HRTEM) micrographs were  
78 obtained from an M/s JOEL JEM 2100 transmission electron microscope with a field emission gun  
79 operating at 200 kV. A custom-built ambient pressure photoelectron spectrometer (Prevac, Poland)  
80 that was equipped with a VG Scienta's R3000HP analyzer and a MX650 monochromator was  
81 utilised to obtain the X-ray photoelectron spectroscopy (XPS) data. The GC-MS of the product  
82 samples were recorded using Thermo Scientific Trace GC Ultra. <sup>1</sup>H NMR was performed using  
83 Bruker Ascend 500 at 500 MHz with CDCl<sub>3</sub> as solvent. The thermal stability of the fresh and used  
84 catalysts was assessed using a simultaneous thermal analyzer (STA 6000, PerkinElmer).

### 85 **Catalytic Study**

86 The HDO reaction was carried out in a 50-mL Teflon-lined autoclave. Prior to the reaction, the  
87 Ni-ITQ-2 composite catalysts were reduced under H<sub>2</sub> pressure at 400 °C for 4 h. In a typical  
88 experiment, *m*-cresol (2 mmol), the catalyst (50 mg contain 8 mol. % of Ni with respect to substrate  
89 concentration), and the solvent (*n*-dodecane, 2 mL) were added to the autoclave. The reactor was  
90 purged with hydrogen (2 MPa) and sealed; subsequently, the autoclave was placed at 170 °C for 6  
91 h. After the reaction was complete, the reactor was cooled, and the liquid products were collected  
92 and analysed using a gas chromatograph (Mayura Analytical 1100 series, FID detector, and HP88  
93 column) using a specified program (70–240 °C, 10° min<sup>-1</sup>). The products of the reactions were  
94 confirmed with authentic samples. The GC patterns of the reaction mixture (Fig. S12) and the  
95 product (Fig. S13) are shown. Further, the same was analysed using FT-IR spectroscopy. The  
96 reaction mixture containing *m*-cresol and *n*-dodecane exhibits peaks characteristic of aromatic  
97 compounds, viz., aromatic ring vibration (3040 cm<sup>-1</sup>;  $\gamma_{C-H}$ ) and the weak combination and  
98 overtone bands in the 1650–1600 cm<sup>-1</sup> region. The disappearance of these bands in the product  
99 mixture supports the hydrogenation of the ring and the loss of aromatic character (Fig. S11), hence  
100 the formation of methyl cyclohexane. The samples were further confirmed by the GC-MS data  
101 obtained. The product mixture was separated from the solvent (*n*-dodecane) by the distillation  
102 method, and the product was confirmed by <sup>1</sup>H NMR.

### 103 **Hot Filtration tests**

104 The catalyst was studied for hot filtration tests to check the metal (Ni) leaching. Initially the  
105 reaction was carried out as mentioned before (*m*-cresol: 2 mmol, 0.05g catalyst, *n*-dodecane: 2 mL,  
106 170 °C, 2MPa) for a duration of 1 h. The catalyst was separated after one hour by filtration. The  
107 filtrate was analysed with GC to obtain the yield. The reaction was continued further with the  
108 filtrate for 5 h under the same reaction conditions. The yield was calculated from the GC analysis.  
109 The results were compared and found that no metal leaching has occurred. This confirms that  
110 nickel species is confined on the surface of ITQ-2 sheets (Fig. S).

### 111 **Catalyst reactivation**

112 The catalyst is recovered by filtration after the reaction. It was washed with isopropyl alcohol to  
113 remove any impurities physisorbed on catalyst surface and further dried. The catalyst was calcined  
114 at 550 °C for 6 h in presence of air to remove any unreacted molecules or coke deposited on  
115 surface. The calcined catalyst was finally reduced in the presence of H<sub>2</sub> at 400 °C for 4 h, thus  
116 obtaining the recovered catalyst.

117

118

119

120

121

122

123

124

125

126

127

128

129

130

131

132

133

134

135

136

137

138

139

140

141

142

143

144

145

146

147

148

149

150

151

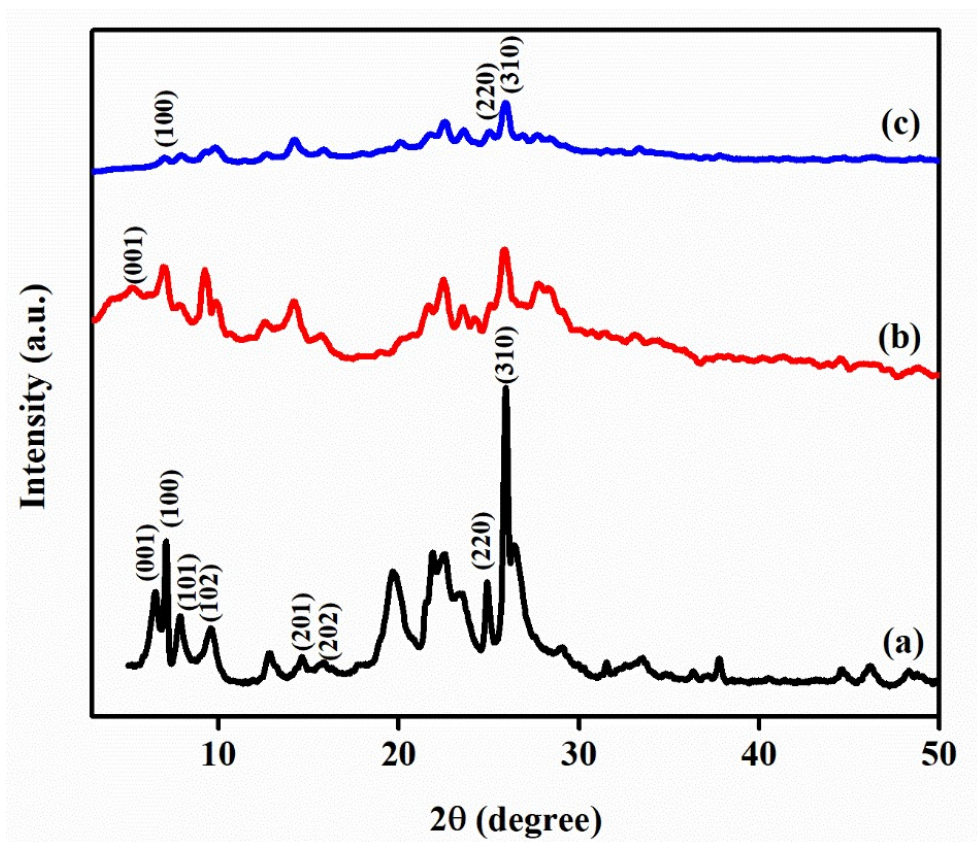

Fig. S1. Powder XRD patterns of (a) MCM-22 (P), (b) MS-1, and (c) ITQ-2.

152

153

154

155

156

157

158

159

160

161

162

163

164

165

166

167

168

169

170

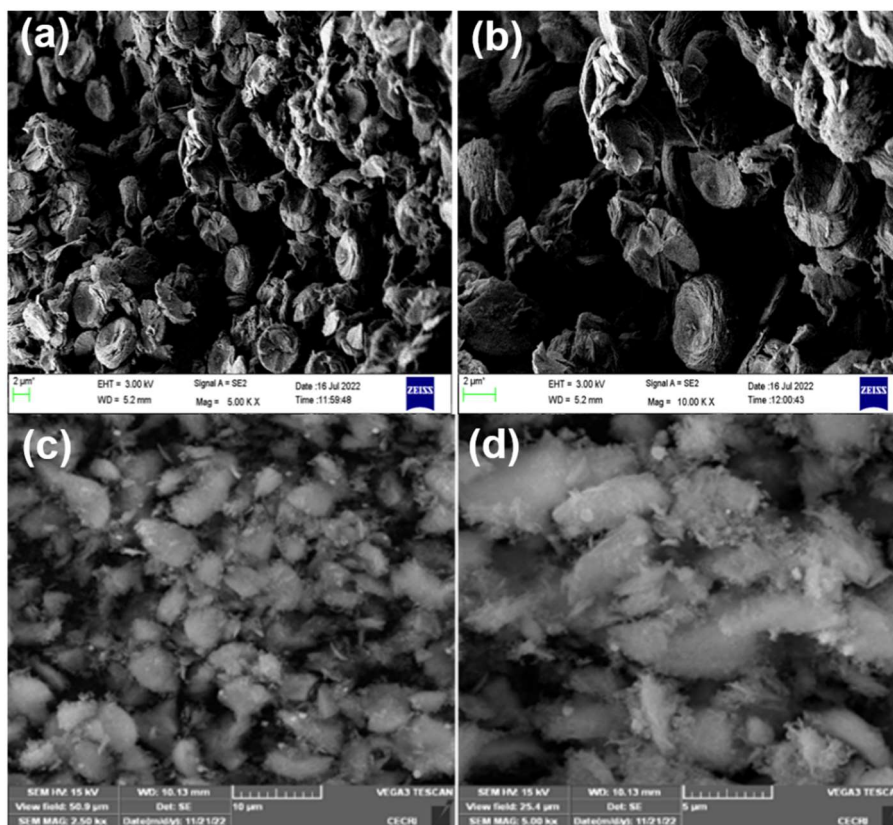

171

Fig. S2. SEM Images of (a), (b) MS-1, and (c), (d) Ni-ITQ-2 composite (4 mmol Ni).

172

173  
174  
175  
176  
177  
178  
179  
180  
181  
182  
183  
184  
185  
186  
187  
188

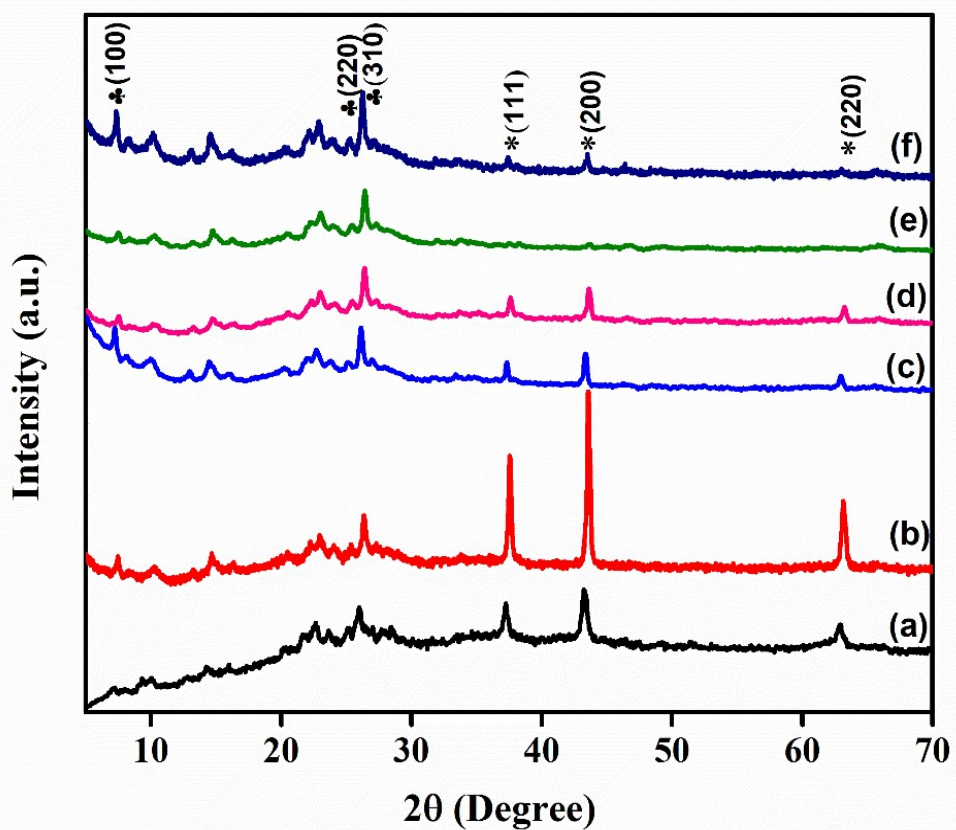

189 Fig. S3. Powder XRD patterns of Ni-ITQ-2 composite prepared at (a) pH =4, Ni= 4 mmol, (b) pH  
190 =2, Ni= 4 mmol, (c) pH =4, Ni= 2 mmol, (d) pH =2, Ni= 2 mmol, (e) pH =4, Ni= 1 mmol, and (f)  
191 pH =2, Ni= 1 mmol (♣ represents ITQ-2 peaks and \* represents nickel oxide peaks).



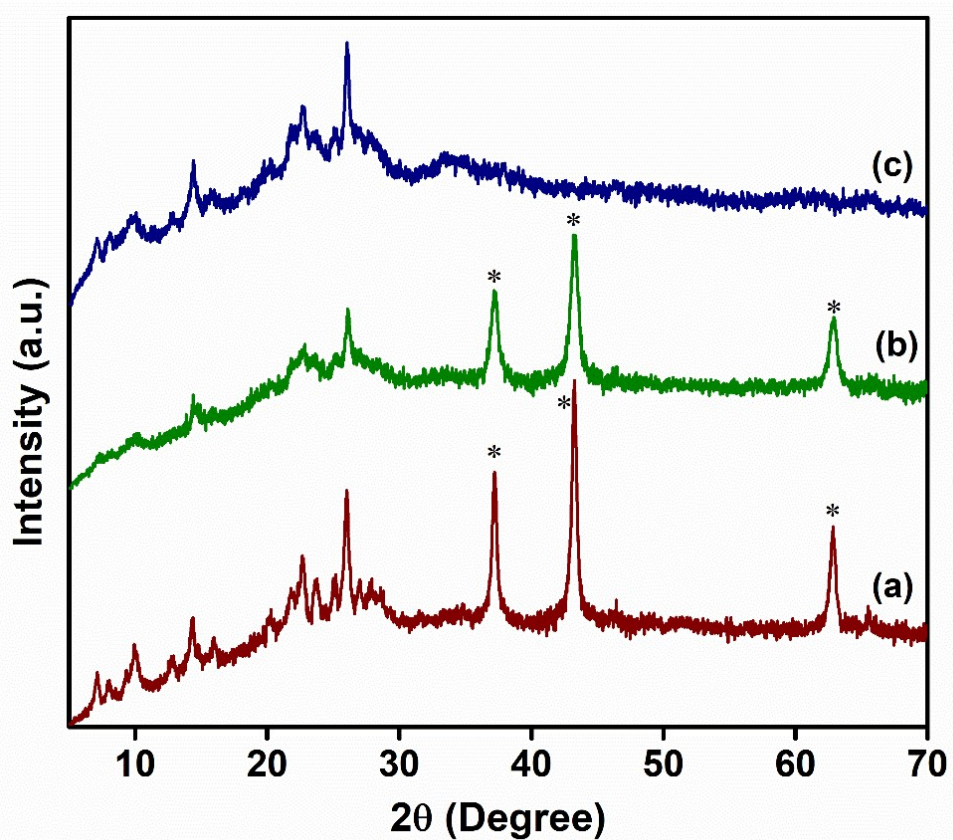

206 Fig. S4. Powder XRD patterns of (a) Ni-MCM-22, (b) ITQ-2-Ni-W, and (c) Physical mixture of  
207 ITQ-2 and NiO (ITQ-2-Ni-P) (\* represents nickel oxide peaks).

| <b>Plane</b> | <b>Sample</b>         | <b>2<math>\theta</math></b> | <b>d-spacing (Å<sup>o</sup>)</b> |
|--------------|-----------------------|-----------------------------|----------------------------------|
| <b>100</b>   | MCM-22 (P)            | 7.1                         | 12.44                            |
|              | Without pH adjustment | 7.5                         | 11.78                            |
|              | pH=4                  | 7.2                         | 12.27                            |
|              | pH=2                  | 7.5                         | 11.78                            |
| <b>101</b>   | MCM-22 (P)            | 7.8                         | 11.33                            |
|              | Without pH adjustment | 8.4                         | 10.52                            |
|              | pH=4                  | 8.1                         | 10.91                            |
|              | pH=2                  | 8.3                         | 10.64                            |
| <b>102</b>   | MCM-22 (P)            | 9.6                         | 9.21                             |
|              | Without pH adjustment | 10.3                        | 8.58                             |
|              | pH=4                  | 9.9                         | 8.93                             |
|              | pH=2                  | 10.3                        | 8.58                             |
| <b>220</b>   | MCM-22 (P)            | 24.9                        | 3.57                             |
|              | Without pH adjustment | 25.5                        | 3.49                             |
|              | pH=4                  | 25.2                        | 3.53                             |
|              | pH=2                  | 25.3                        | 3.52                             |
| <b>310</b>   | MCM-22 (P)            | 25.95                       | 3.43                             |
|              | Without pH adjustment | 26.32                       | 3.38                             |
|              | pH=4                  | 26                          | 3.42                             |
|              | pH=2                  | 26.35                       | 3.38                             |

220  
221  
222  
223  
224  
225  
226  
227  
228  
229  
230  
231  
232  
233  
234  
235  
236  
237  
238  
239  
240  
241  
242  
243  
244

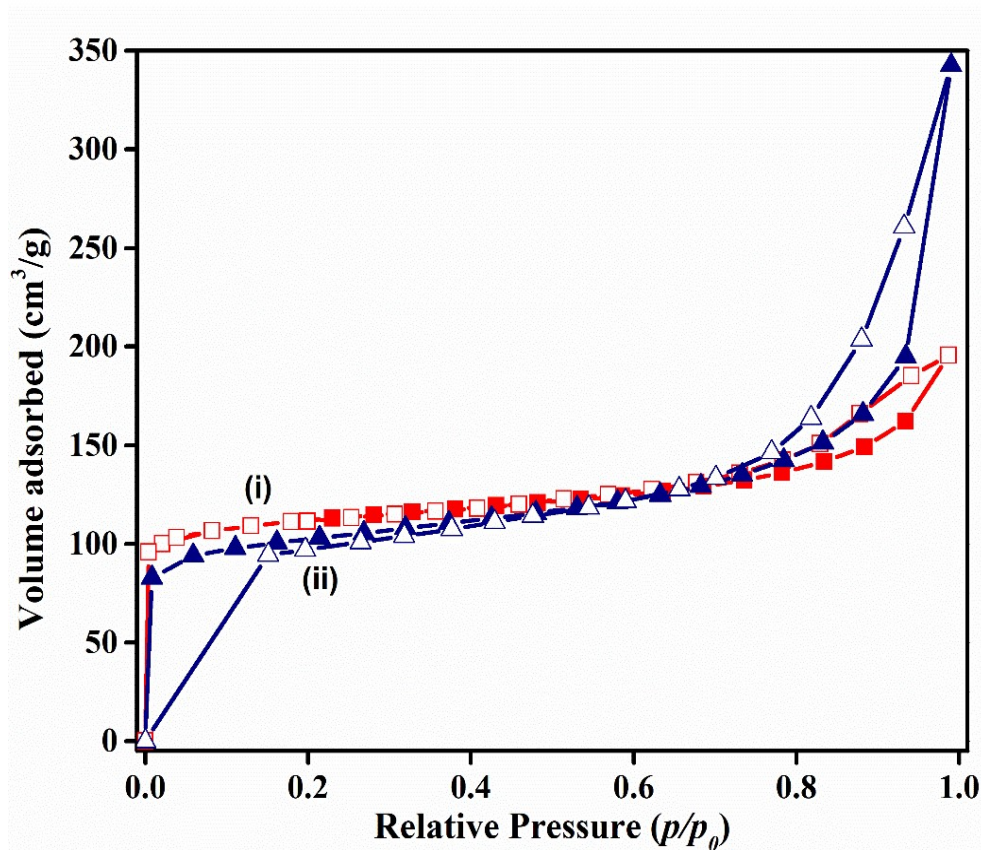

Fig. S5. Nitrogen sorption isotherm of (i) MCM-22, and (ii) ITQ-2.

245

246

247

248

249

250

251

252

253

254

255

256

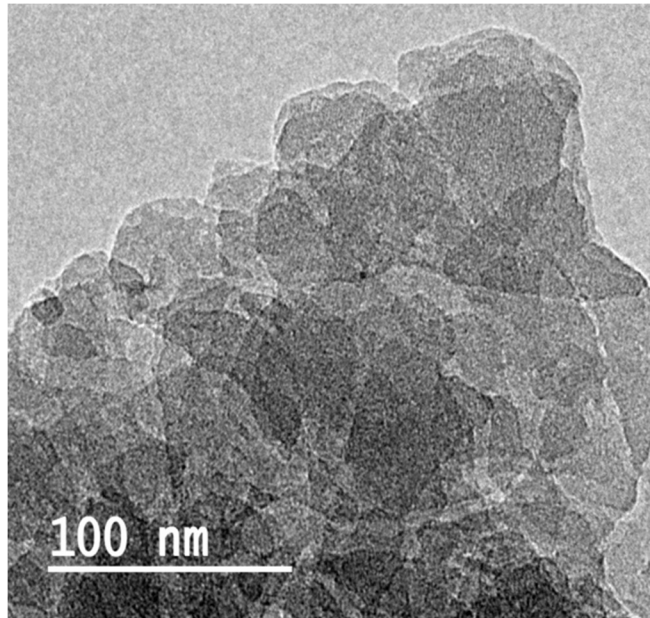

257

258

Fig. S6 TEM images of MCM-22 sample.

259

260

261

262

263

264

265

266

267

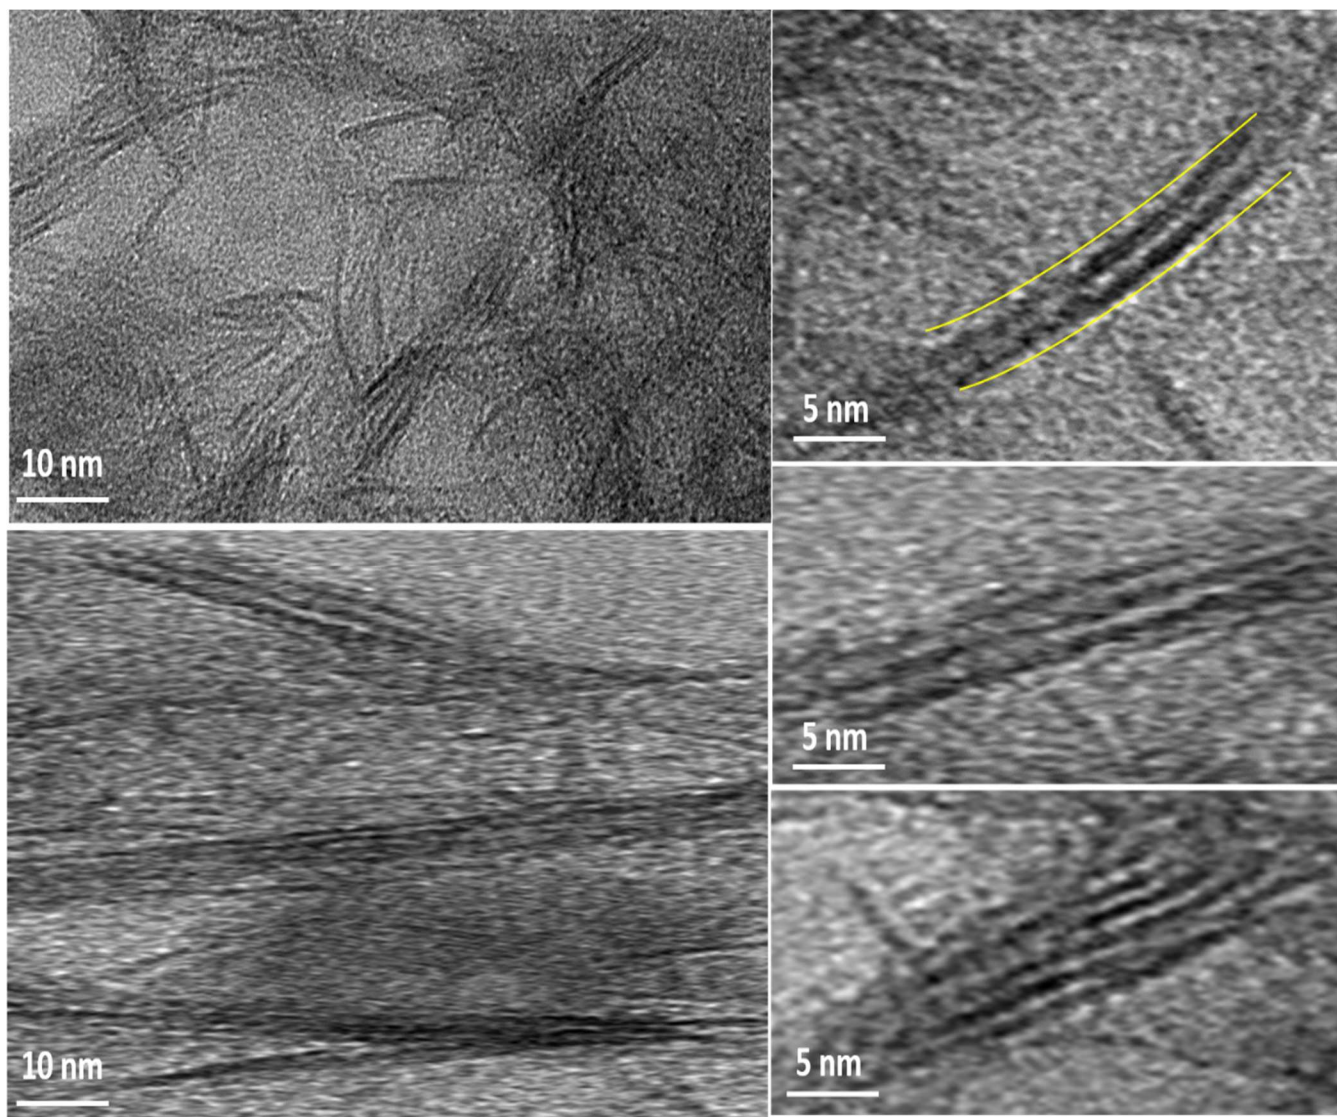

268

269 Fig. S7. HR-TEM images of Ni-ITQ-2 composite showing the delaminated ITQ-2 sheets with  
270 decorated NiO(OH).

271



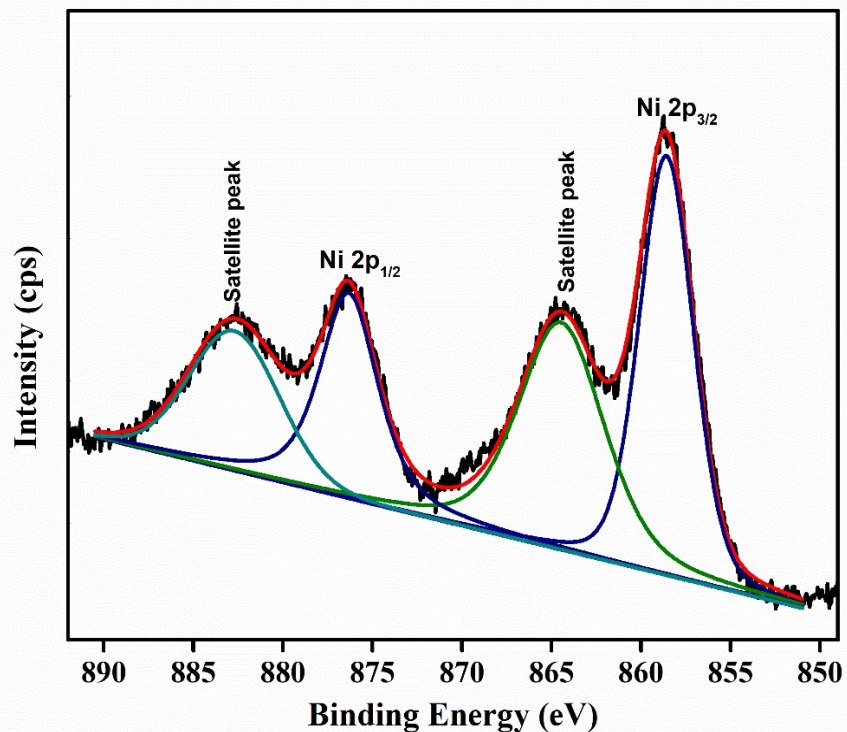

Fig. S8. XPS Profile of Ni 2p in Ni-ITQ-2 composite.

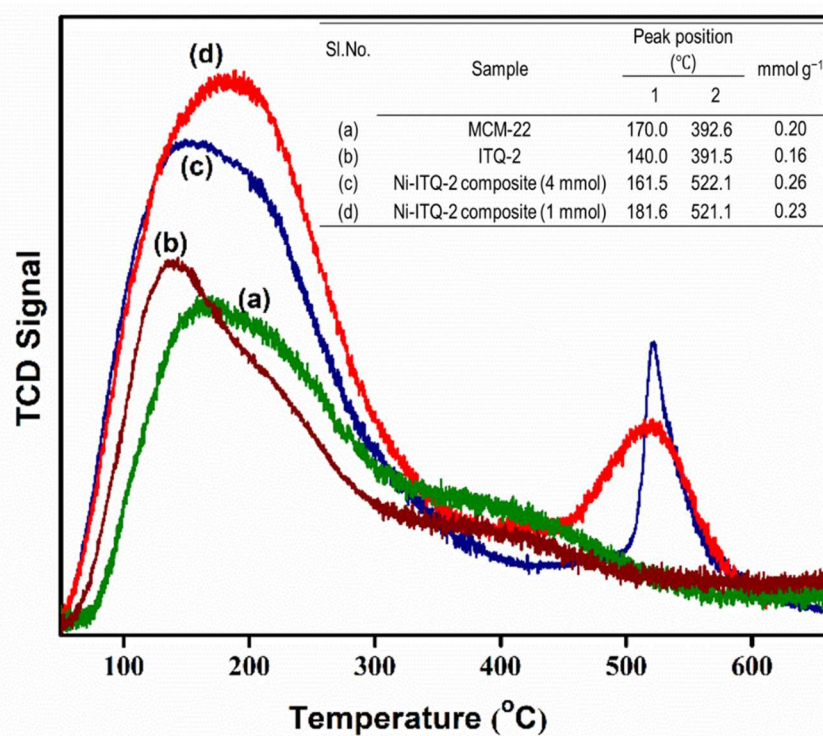

Fig. S9. Ammonia temperature programmed desorption profile of (a) MCM-22, (b) ITQ-2, and Ni-ITQ-2 composite prepared with Ni concentration of (c) 4 mmol, and (d) 1 mmol.

300  
301  
302  
303

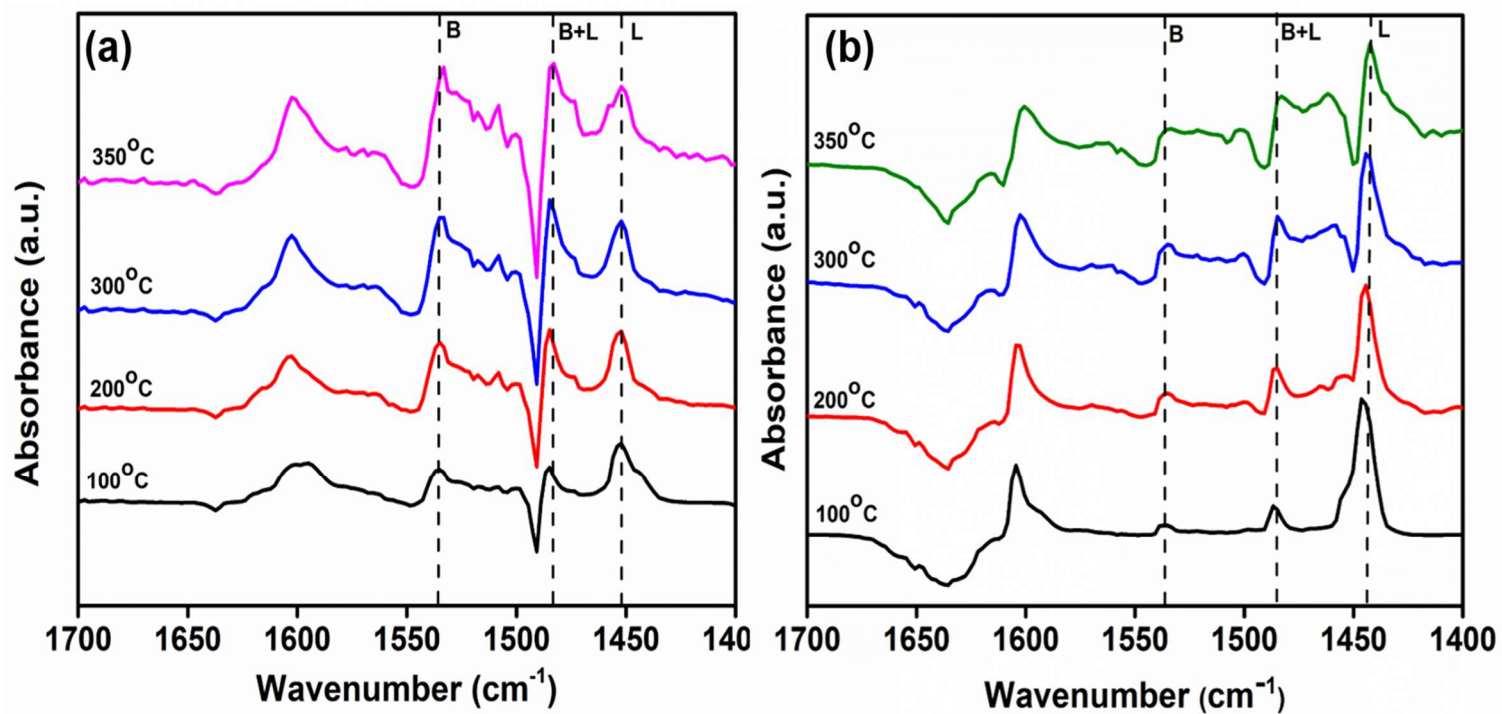

304  
305  
306  
307

Fig. S10. IR Pyridine desorption spectra of (a) MCM-22, and (b) Ni-ITQ-2 composite.

308  
309  
310  
311  
312  
313  
314  
315  
316  
317  
318  
319  
320  
321  
322  
323  
324

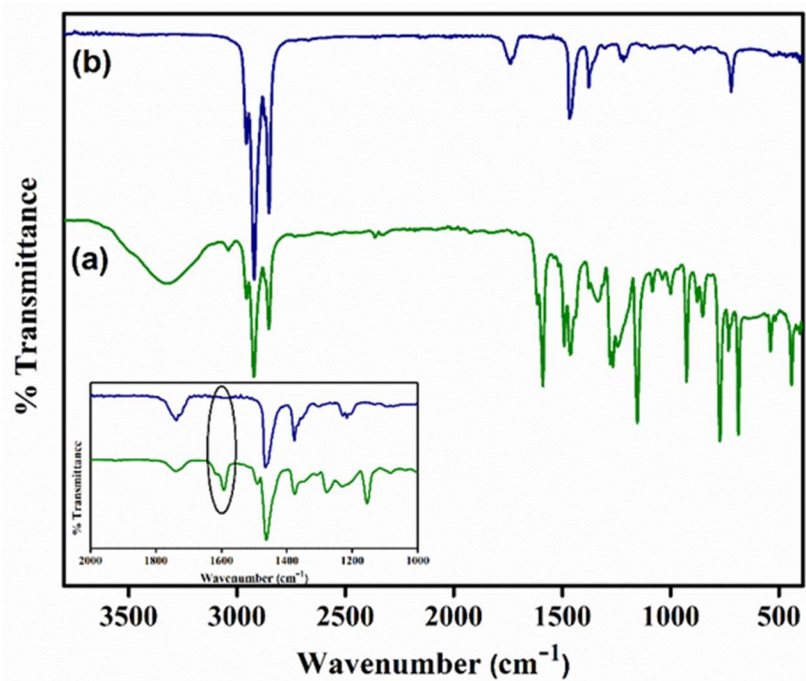

Fig. S11. FTIR spectra of (a) Reaction and (b) Product mixture of *m*-cresol HDO processes.



325  
326  
327  
328  
329  
330  
331  
332  
333  
334

### XXXX Report

Printing time: Thu Apr 20 15:21:35 2023  
Injection time: Thu Apr 20 12:50:01 2023

File opened: D:\Old Files\Nimisha\HP88\m-cresolHDO\Ni-ITQ-2 comp\ Reaction mixture;m-cresol and DD.hw

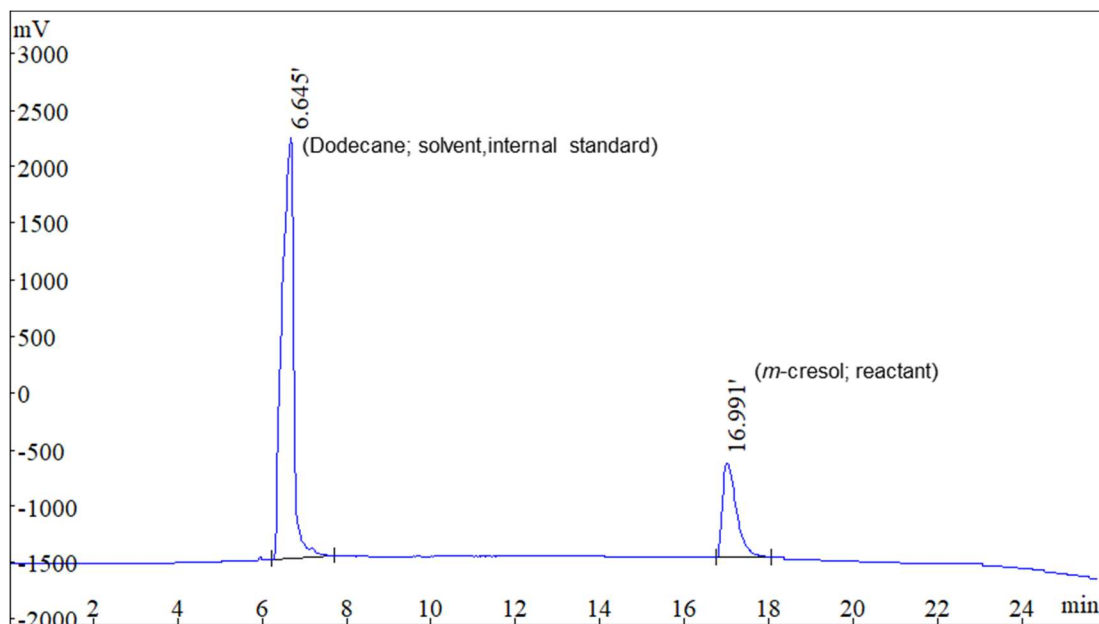

351  
352  
353  
354  
355  
356  
357  
358  
359  
360  
361  
362  
363  
364

| Rank  | Time   | Name                                 | Area% | Area     |
|-------|--------|--------------------------------------|-------|----------|
| 1     | 6.645  | Dodecane; solvent, internal standard | 78.88 | 67427891 |
| 2     | 16.991 | m-cresol; reactant                   | 21.12 | 18056621 |
| Total |        |                                      | 100   | 85484512 |

365  
366  
367  
368  
369  
370

Fig. S12. GC pattern of the starting reaction mixture.

XXXX Report

371  
372  
373  
374  
375  
376  
377  
378  
379  
380

Printing time: Thu Apr 20 16:52:17 2023

Injection time: Thu Jul 20 14:59:48 2023

File opened: D:\Old Files\Nimisha\HP88\m-cresol HDO\Ni-ITQ-2  
comp\DD,cresol,methylcyclohexane.hw

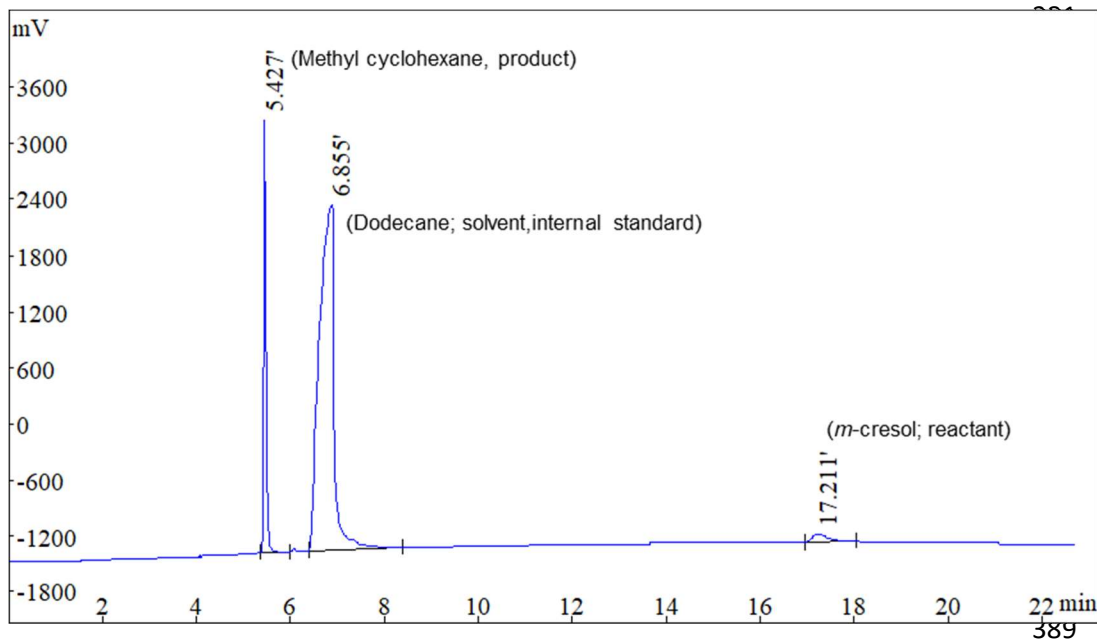

390  
391  
392  
393  
394  
395  
396  
397  
398  
399  
400  
401

| Rank  | Time   | Name                                 | Area% | Area     |
|-------|--------|--------------------------------------|-------|----------|
| 1     | 5.427  | Methyl cyclohexane, product          | 13.03 | 11823204 |
| 2     | 6.855  | Dodecane; solvent, internal standard | 84.89 | 77058227 |
| 3     | 17.211 | m-cresol; reactant                   | 2.085 | 1892803  |
| Total |        |                                      | 100   | 90774234 |

402  
403  
404  
405

Fig. S13. GC pattern of the product mixture.

RT: 0.00 - 10.00

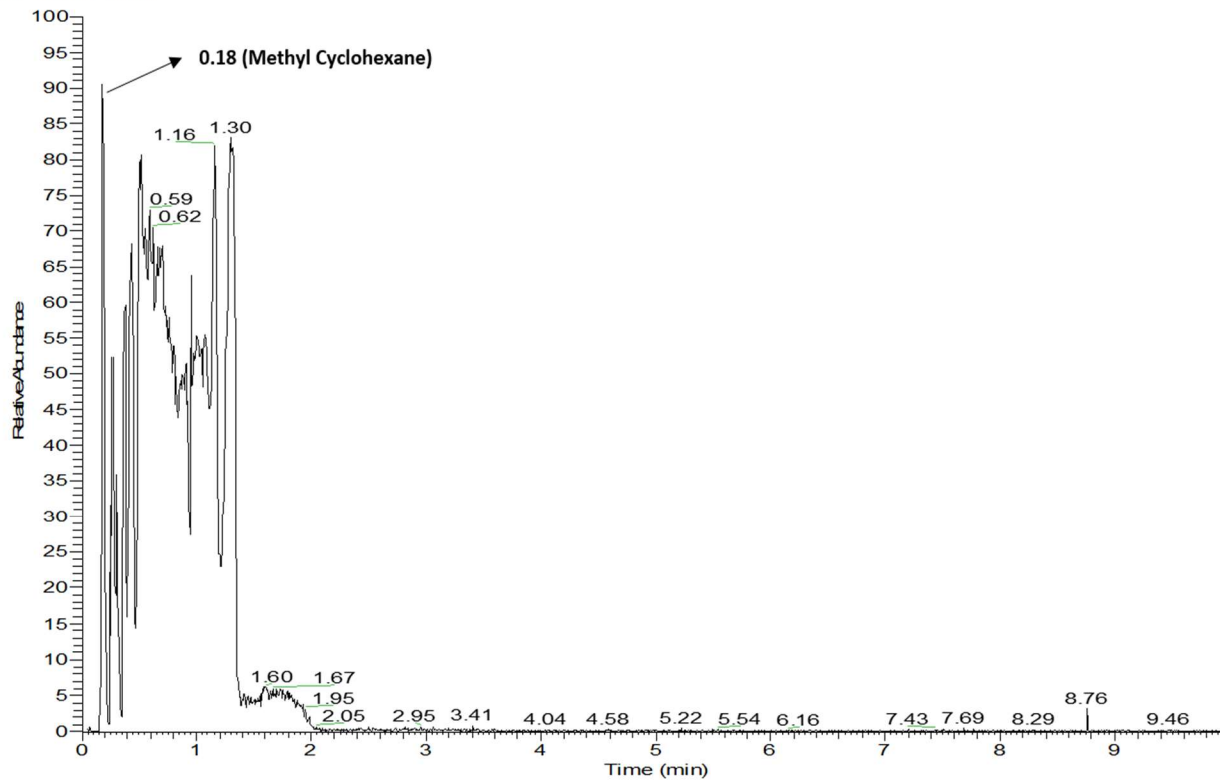

NL:  
2.08E5  
TIC MS  
Sample\_M  
1

406

407

408 Sample\_M1 #21 RT: 0.18 AV: 1 NL: 6.05E4

T: + c Full ms [50.00-250.00]

409

410

411

412

413

414

415

416

417

418

419

420

421

422

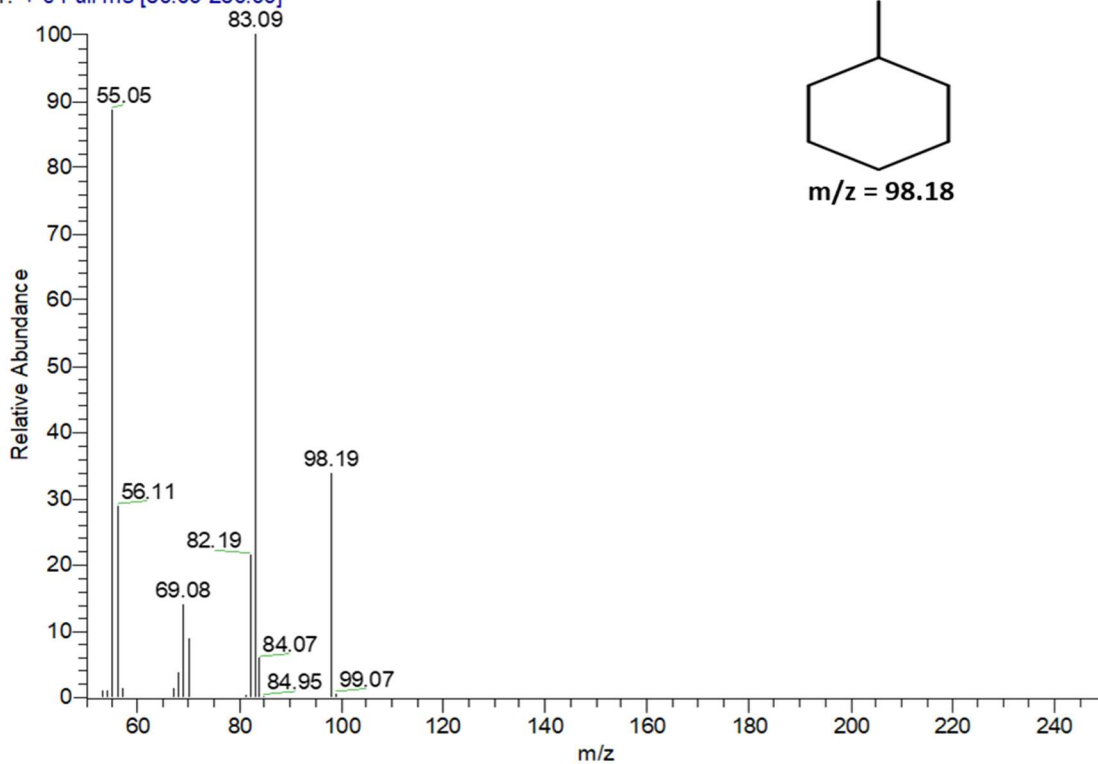

423 Fig. S14. GC-MS chromatogram of exclusive hydrodeoxygenated product, viz., methyl  
424 cyclohexane.

425  
426  
427  
428  
429  
430  
431

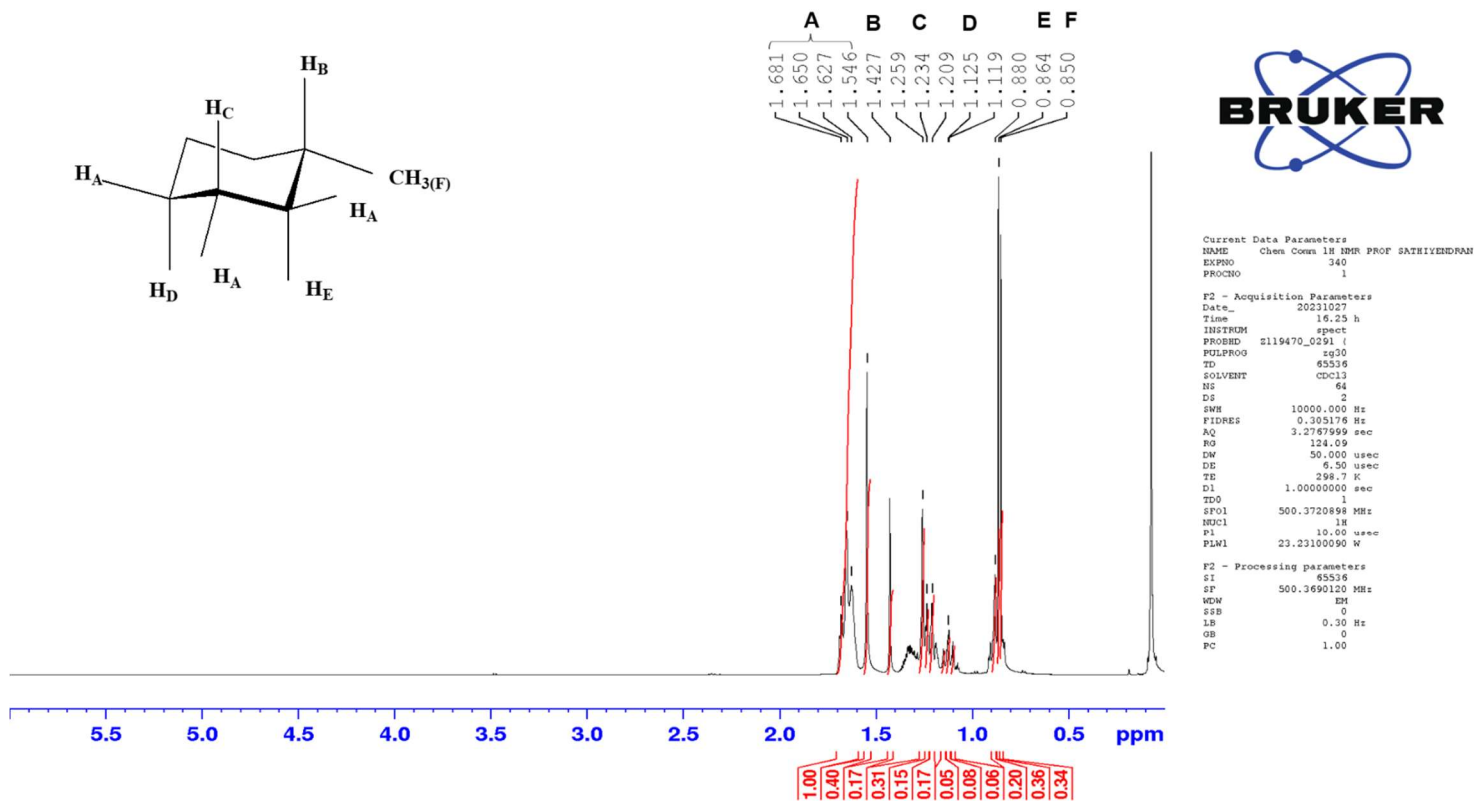

432  
433  
434  
435  
436  
437

Fig. S15 <sup>1</sup>H NMR of exclusive hydrodeoxygenated product, viz., methylcyclohexane;(Additional peaks are due to the presence of trace amount of *n*-dodecane; solvent used in *m*-cresol HDO reaction)<sup>2</sup>.

438  
439  
440  
441  
442  
443  
444  
445  
446  
447  
448  
449  
450  
451  
452  
453  
454  
455  
456  
457  
458  
459  
460  
461  
462  
463

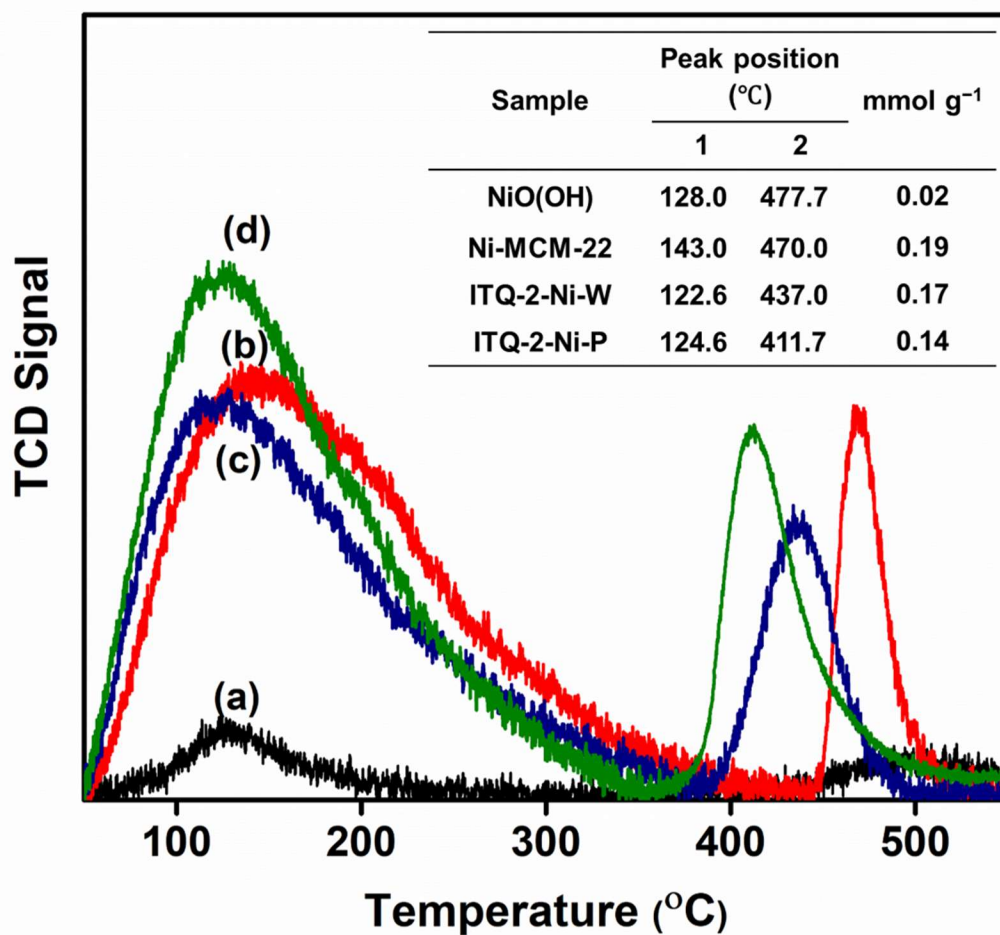

Fig. S16. Ammonia temperature programmed desorption profile of (a) NiO(OH), (b) Ni-MCM-22, (c) ITQ-2-Ni-W, and (d) ITQ-2-Ni-P.

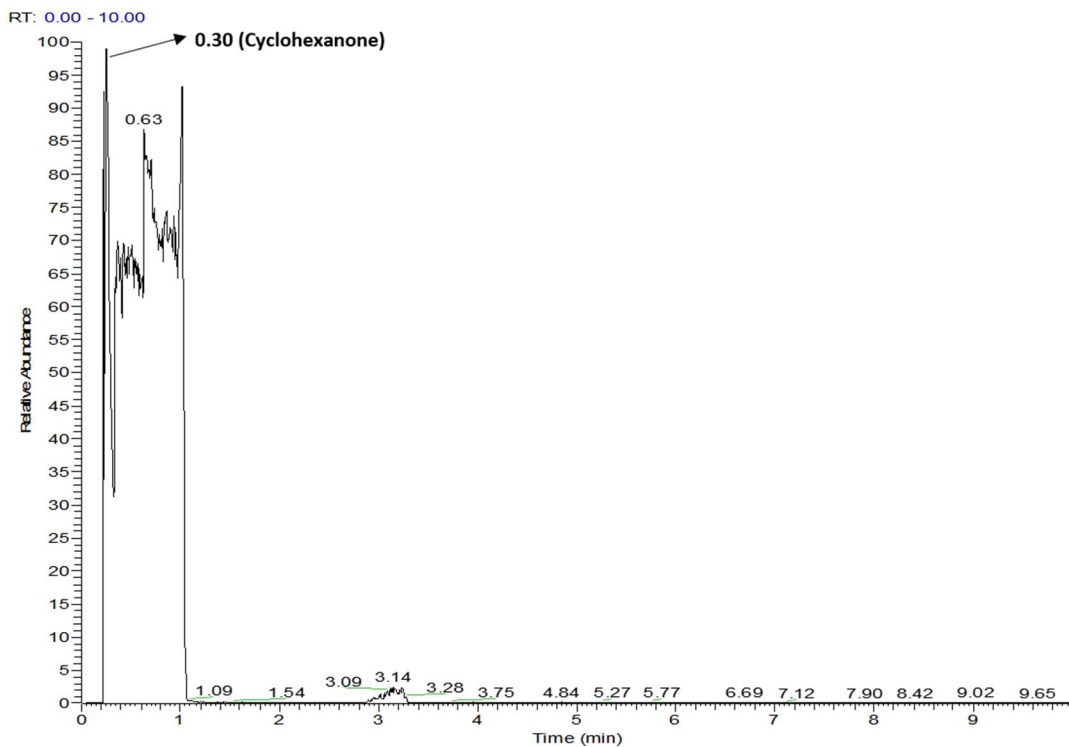

464

465

466 SAMPLE\_M8 #37 RT: 0.30 AV: 1 NL: 5.12E4  
T: + c Full ms [50.00-250.00]

467

468

469

470

471

472

473

474

475

476

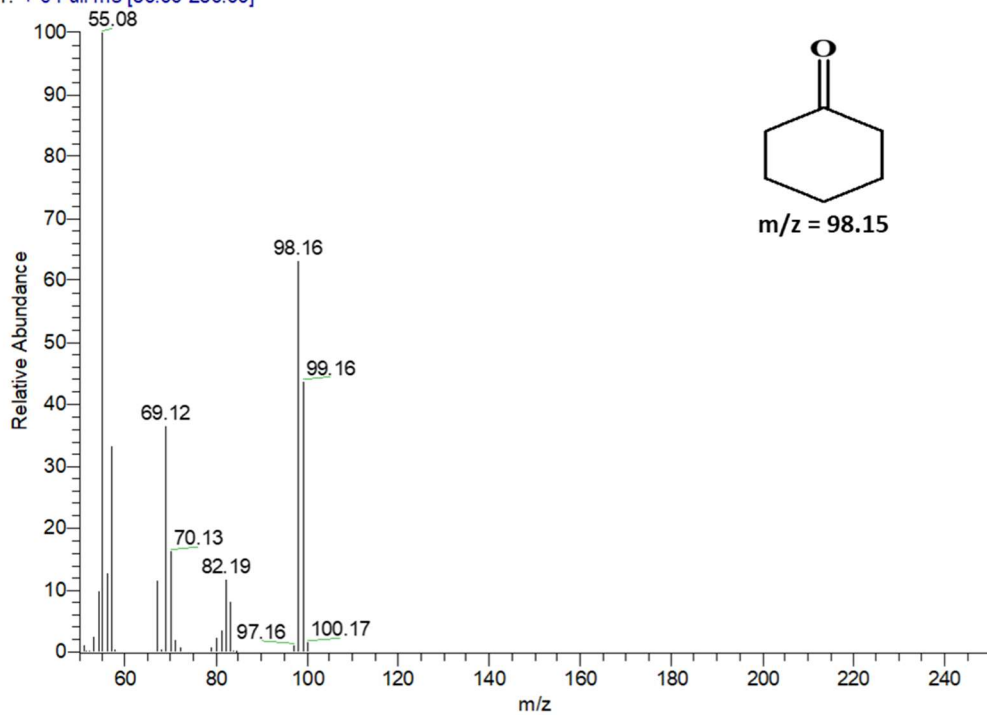

477 Fig. S17. GC-MS chromatogram of cyclohexanone (intermediate product in HDO).

478

RT: 0.00 - 10.00

NL:  
1.85E6  
TIC MS  
Sample\_M  
2

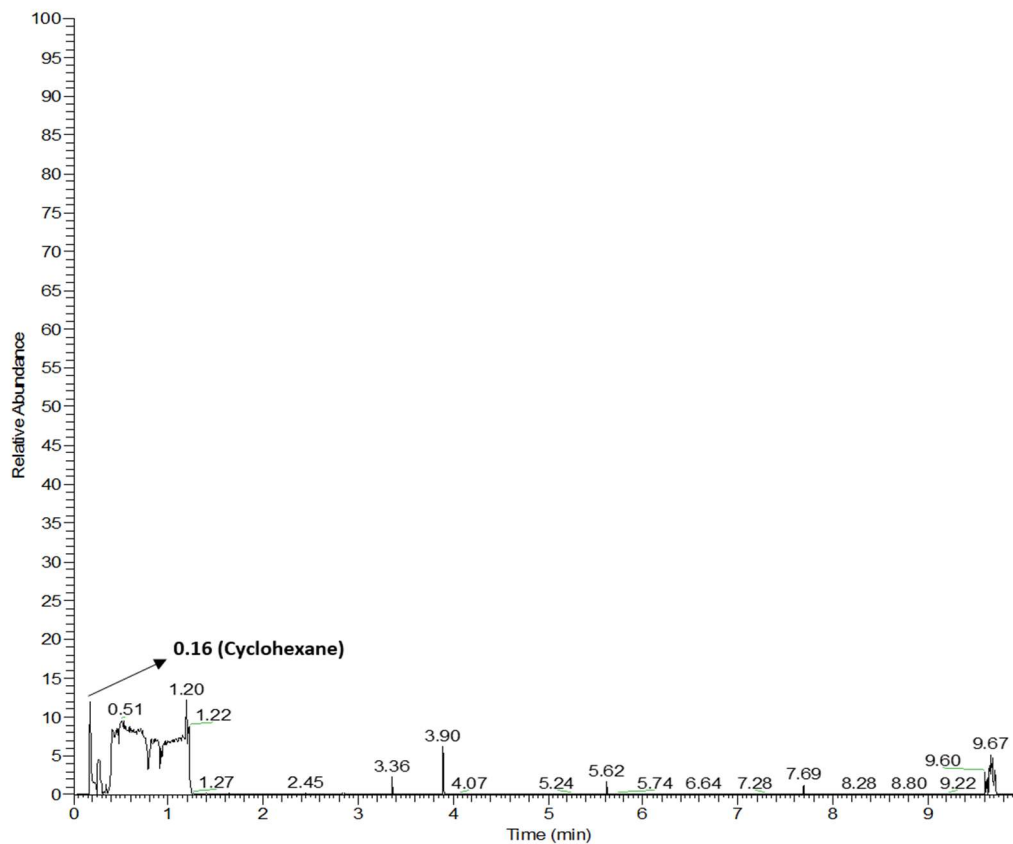

479

480

Sample\_M2 #33 RT: 0.16 AV: 1 NL: 5.13E4  
T: + c Full ms [50.00-250.00]

481

482

483

484

485

486

487

488

489

490

491

492

493

494

495

496

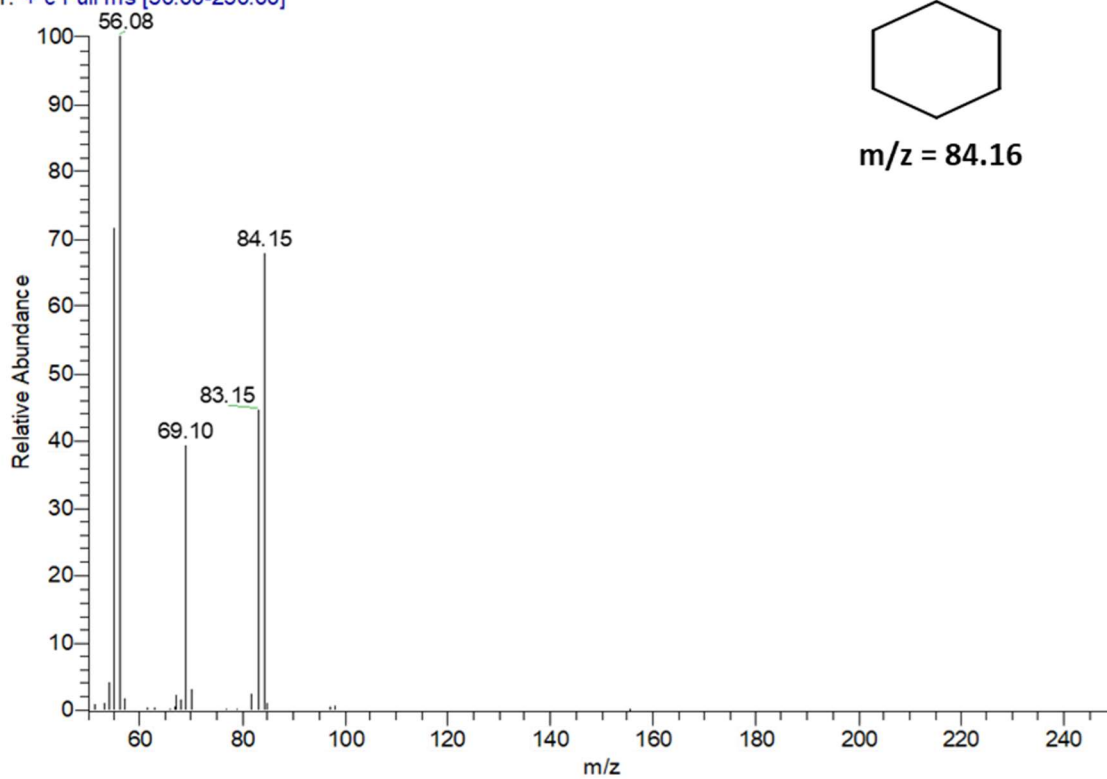

Fig. S18. GC-MS chromatogram of hydro-deoxygenated product of phenol.

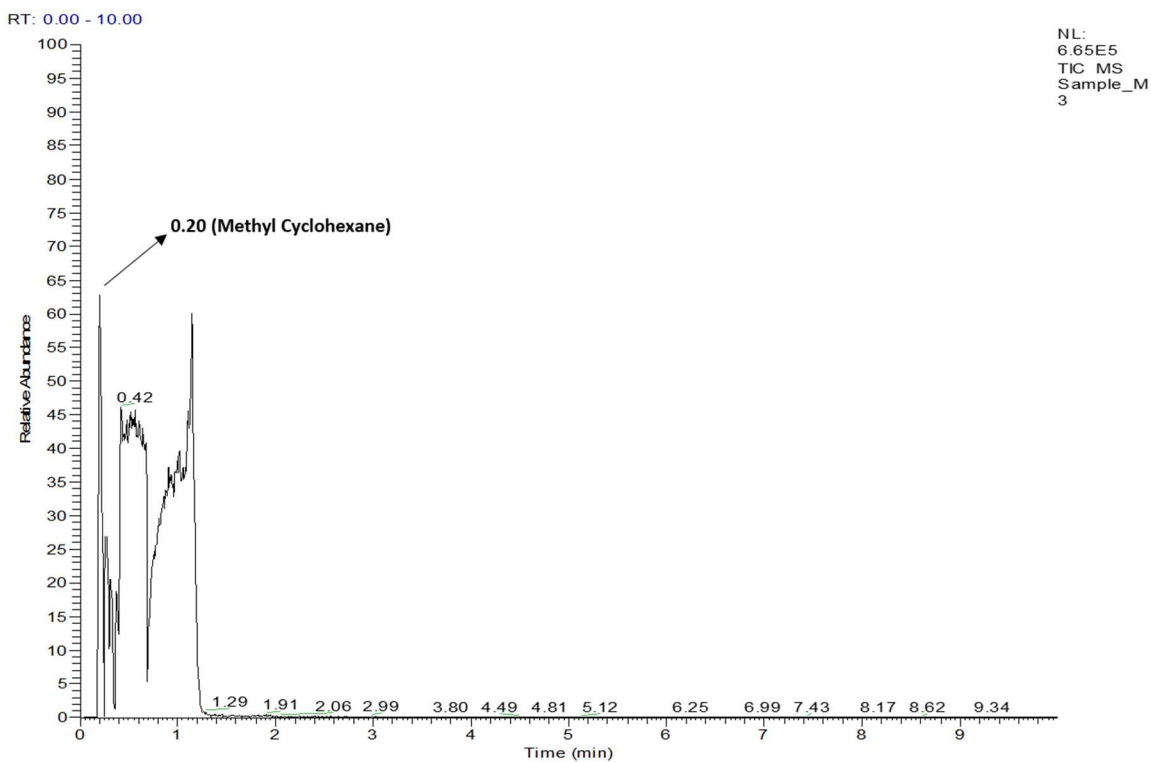

497

498

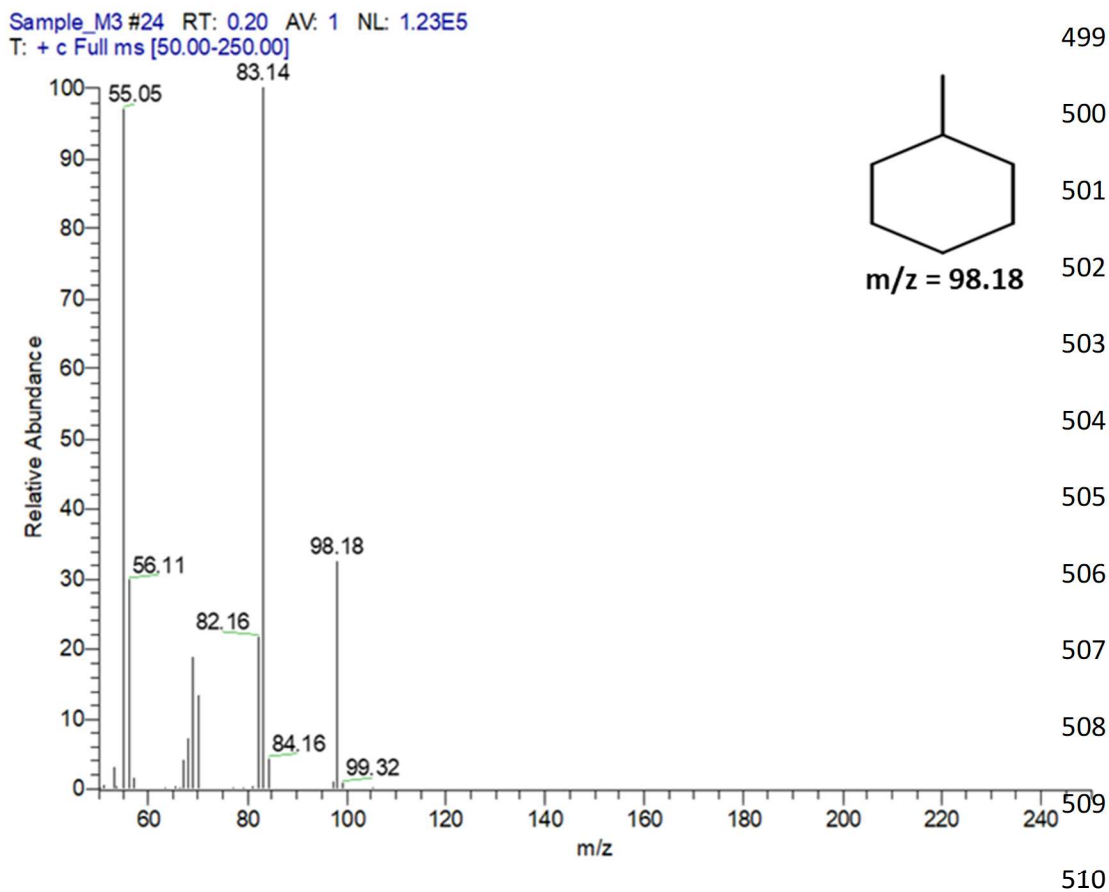

511

Fig. S19. GC-MS chromatogram of hydrogenated product of toluene.



512  
513  
514  
515  
516  
517  
518  
519  
520  
521  
522  
523  
524  
525  
526  
527  
528  
529  
530  
531  
532  
533  
534  
535  
536  
537  
538  
539  
540  
541

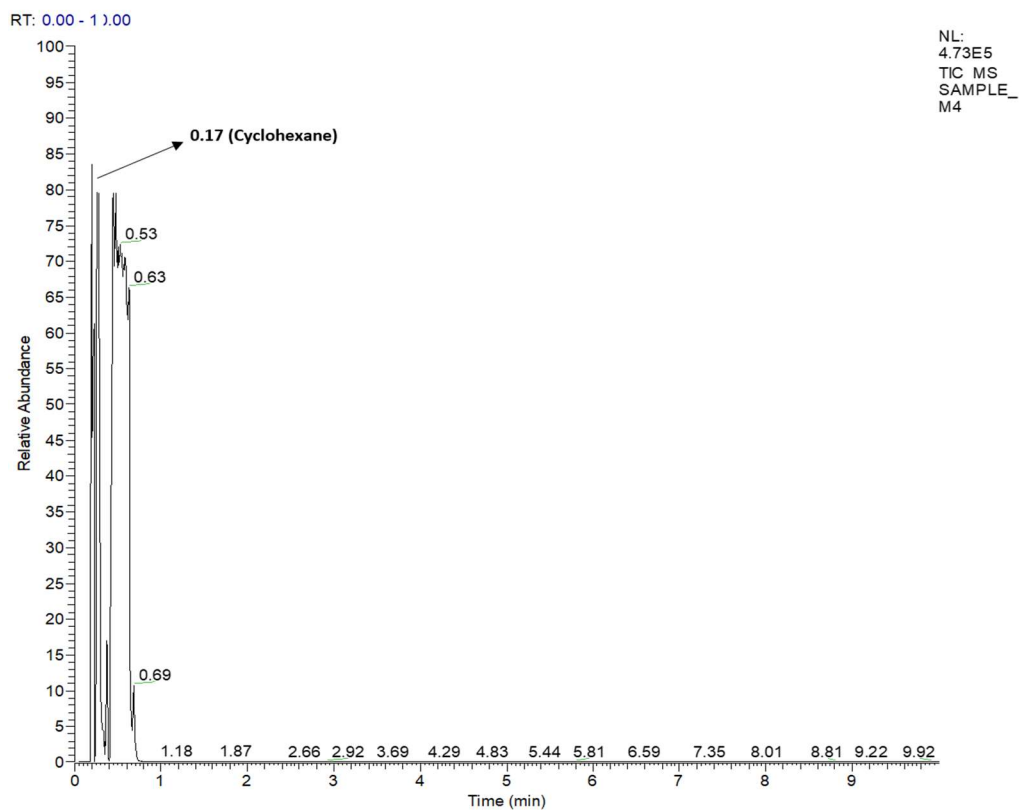

SAMPLE\_M4 #37 RT: 0.17 AV: 1 NL: 2.23E4  
T: + c Full ms [50.00-250.00]

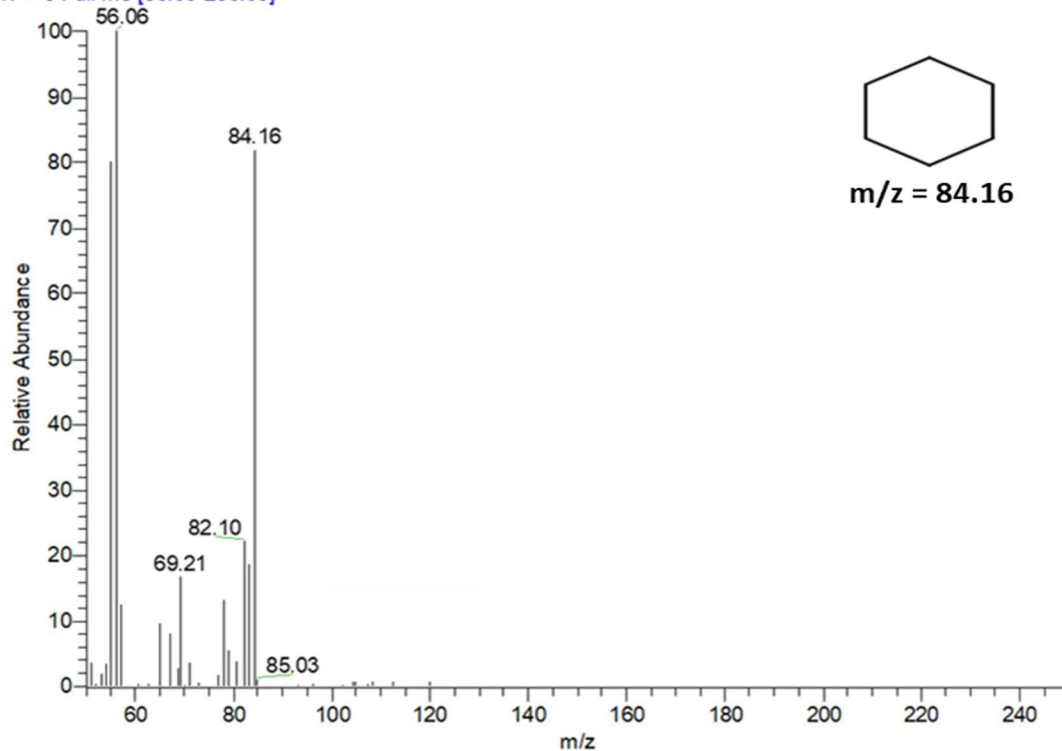

Fig. S20. GC-MS chromatogram of hydrodeoxygenated product of anisole.

## Sample Header

Data File: s5  
Original Data Path: H:\data\DGN  
Sample Name: deependra  
Dr. D. Tripathi  
Comments:

RT: 2.00 - 18.29 SM: 13G (Cyclohexane, (1-methylethyl))

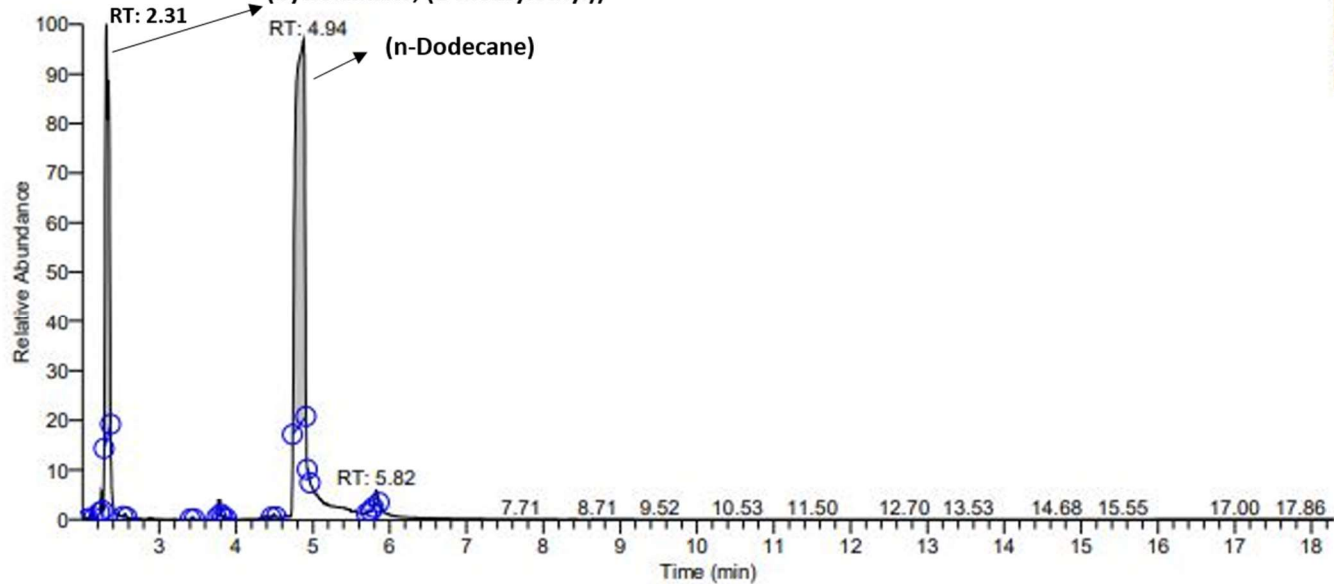

NL:  
5.29E9  
TIC MS  
ICIS s5

542

543

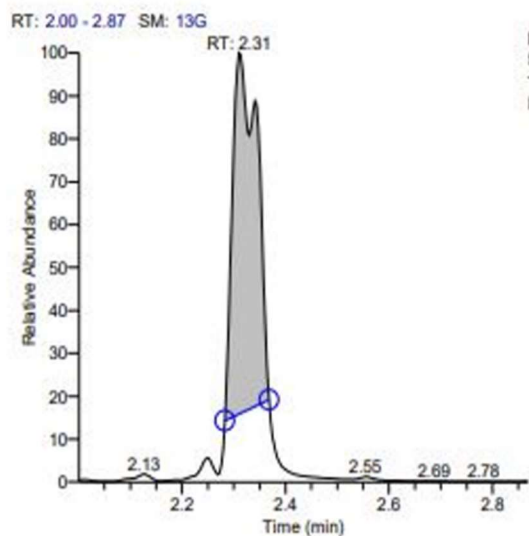

NL:  
5.29E9  
TIC MS  
ICIS s5

s5 #92 RT: 2.31 AV: 1 NL: 1.12E9  
T: + c EI Full ms [50.00-500.00]

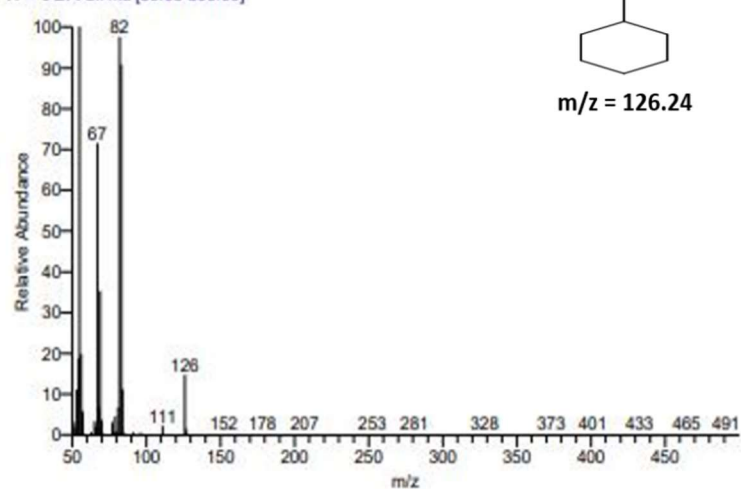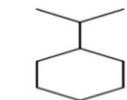

m/z = 126.24

544

545

546

547

548

Fig. S21. GC-MS chromatogram of hydrogenated product of cumene.

# Sample Header

Data File: s6  
Original Data Path: H:\data\DGN  
Sample Name: Dr. D. Tripathi  
Comments: deependra

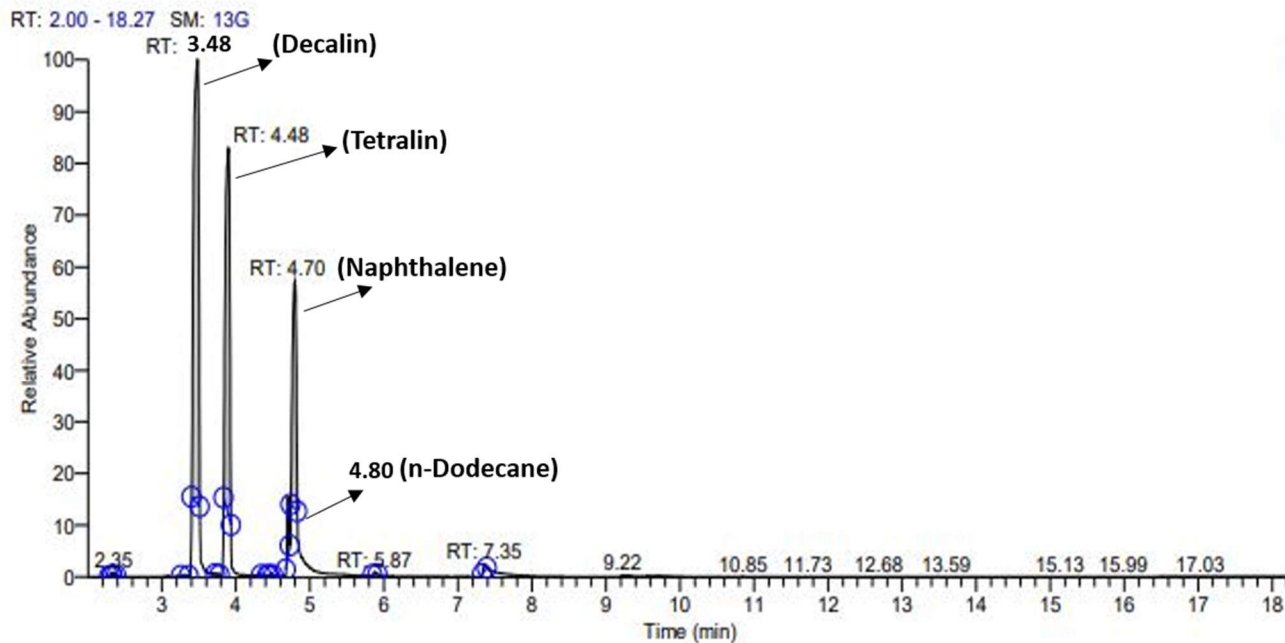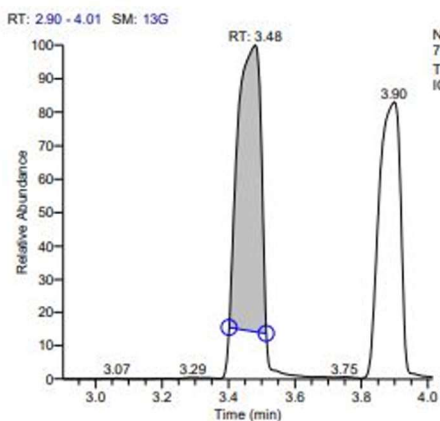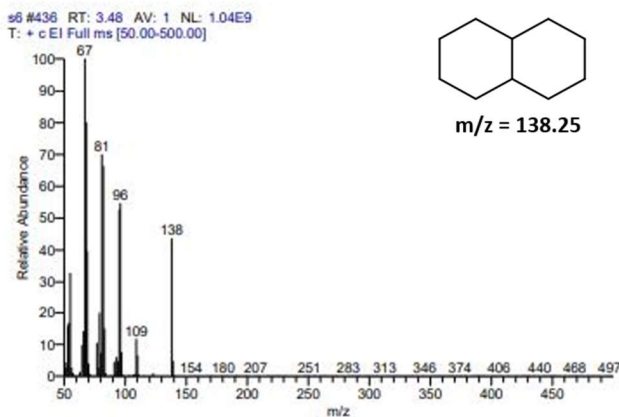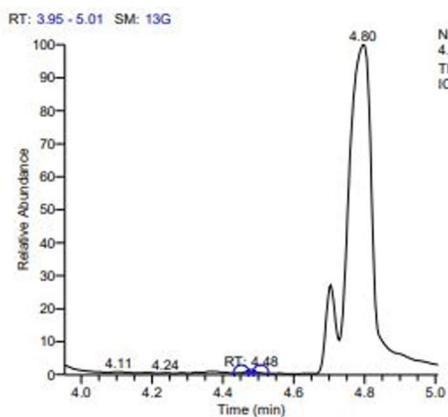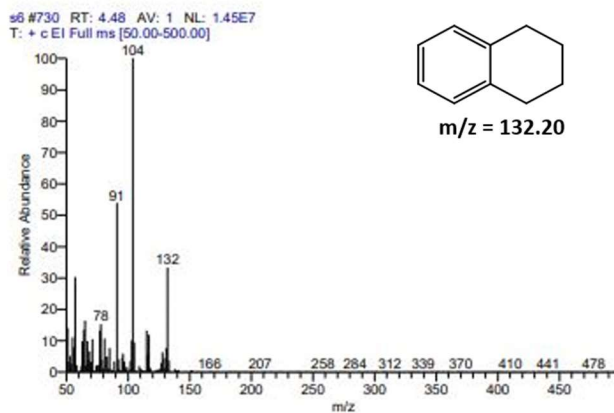

549

550

551

Fig. S22. GC-MS chromatogram of hydrogenated product of naphthalene.

# XXXX Report

552  
553  
554  
555  
556  
557  
558  
559  
560  
561  
562  
563  
564  
565  
566  
567  
568  
569  
570  
571  
572  
573  
574  
575  
576  
577  
578  
579  
580  
581  
582  
583  
584  
585  
586  
587  
588  
589  
590  
591  
592  
593  
594  
595

Printing time: Tue Nov 28 10:24:58 2023  
Injection time: Fri Nov 24 11:03:18 2023  
File opened: D:\Old Files\Nimisha\HP88\m-cresol\m-cresol after column cut\M 100 GAS REP.hw

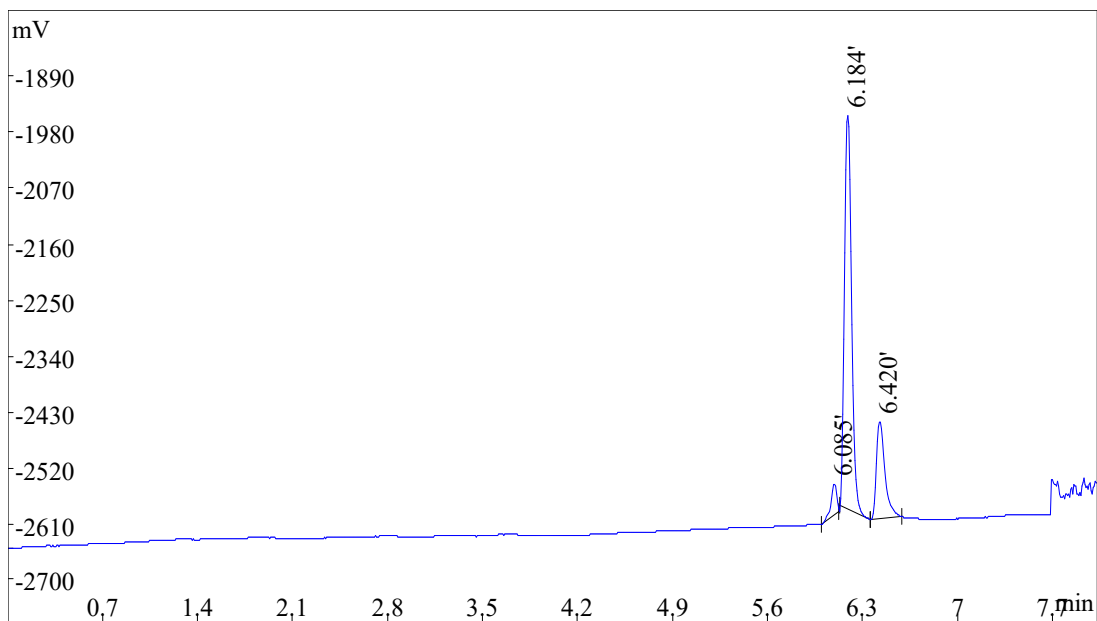

| Rank  | Time  | Name | Area% | Area    |
|-------|-------|------|-------|---------|
| 1     | 6.085 |      | 4.673 | 130648  |
| 2     | 6.184 |      | 73.03 | 2041588 |
| 3     | 6.420 |      | 22.3  | 623523  |
| Total |       |      | 100   | 2795759 |

Fig. S23. GC pattern showing the gas product containing methanol in anisole HDO.

596  
597  
598  
599  
600  
601  
602  
603

# XXXX Report

Printing time: Tue Nov 28 10:29:44 2023  
Injection time: Sat Nov 25 11:40:14 2023  
File opened: D:\Old Files\Nimisha\HP88\m-cresol\m-cresol after column cut\M 100 LIQ.hw

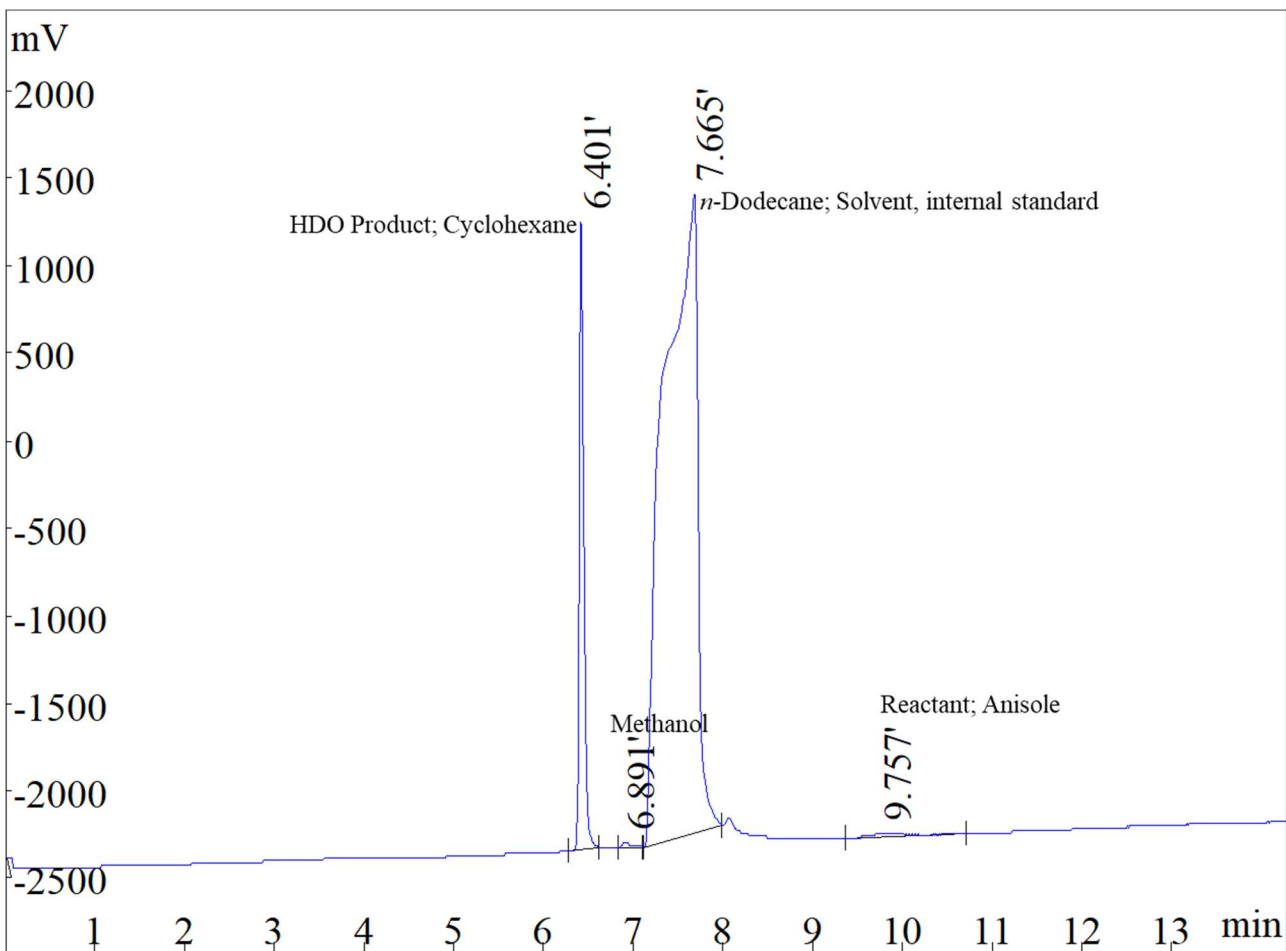

604  
605  
606  
607  
608  
609  
610  
611  
612  
613  
614  
615  
616  
617

| Rank  | Time  | Name                                   | Area%  | Area      |
|-------|-------|----------------------------------------|--------|-----------|
| 1     | 6.401 | HDO Product; Cyclohexane               | 9.84   | 9993574   |
| 2     | 6.891 | Methanol                               | 0.1741 | 176774    |
| 3     | 7.665 | n-Dodecane; Solvent, internal standard | 89.53  | 90926227  |
| 4     | 9.757 | Reactant; Anisole                      | 0.4564 | 463565    |
| Total |       |                                        | 100    | 101560140 |

Fig. S24. GC pattern showing the liquid product of anisole HDO.

618  
619  
620

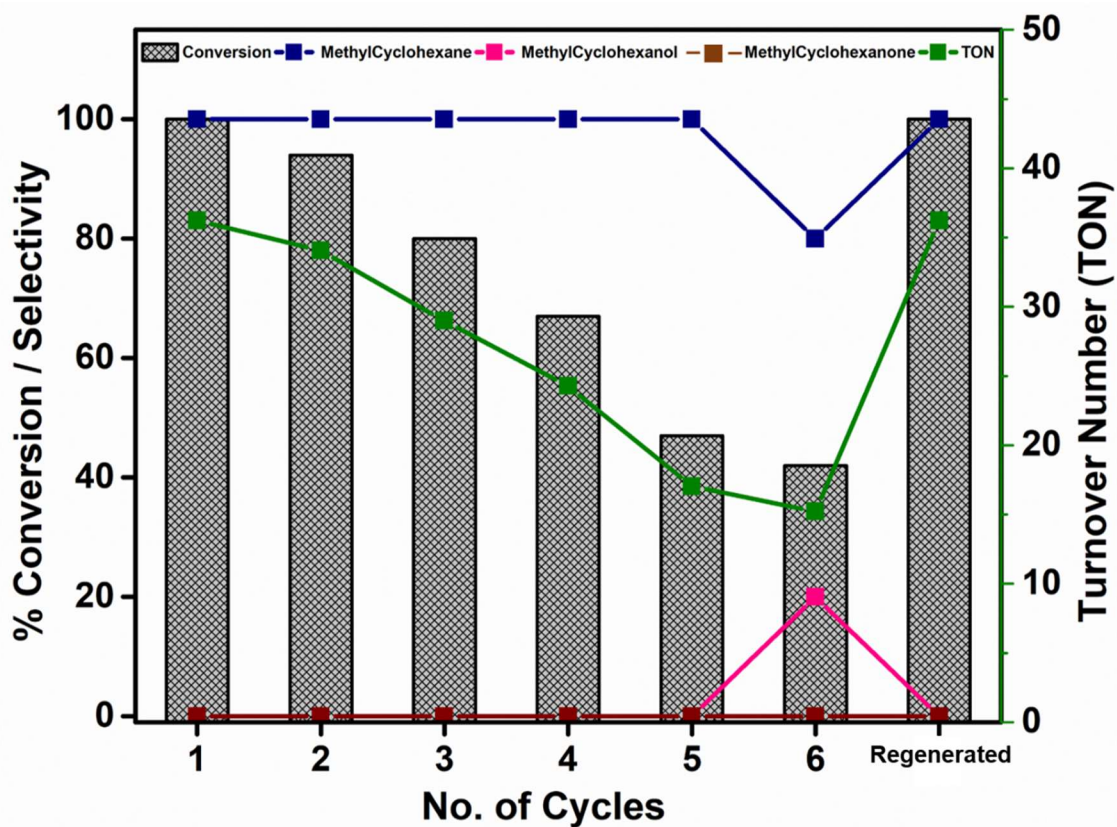

621

622 Fig. S25. Recyclability studies over Ni-ITQ-2 composite (Reaction conditions: *m*-cresol-2 mmol,  
623 T = 170 °C, t = 6 h, Pressure-2 MPa, Solvent = *n*-dodecane).

624

625

626

627

628

629

630

631

632



633

634

635

636

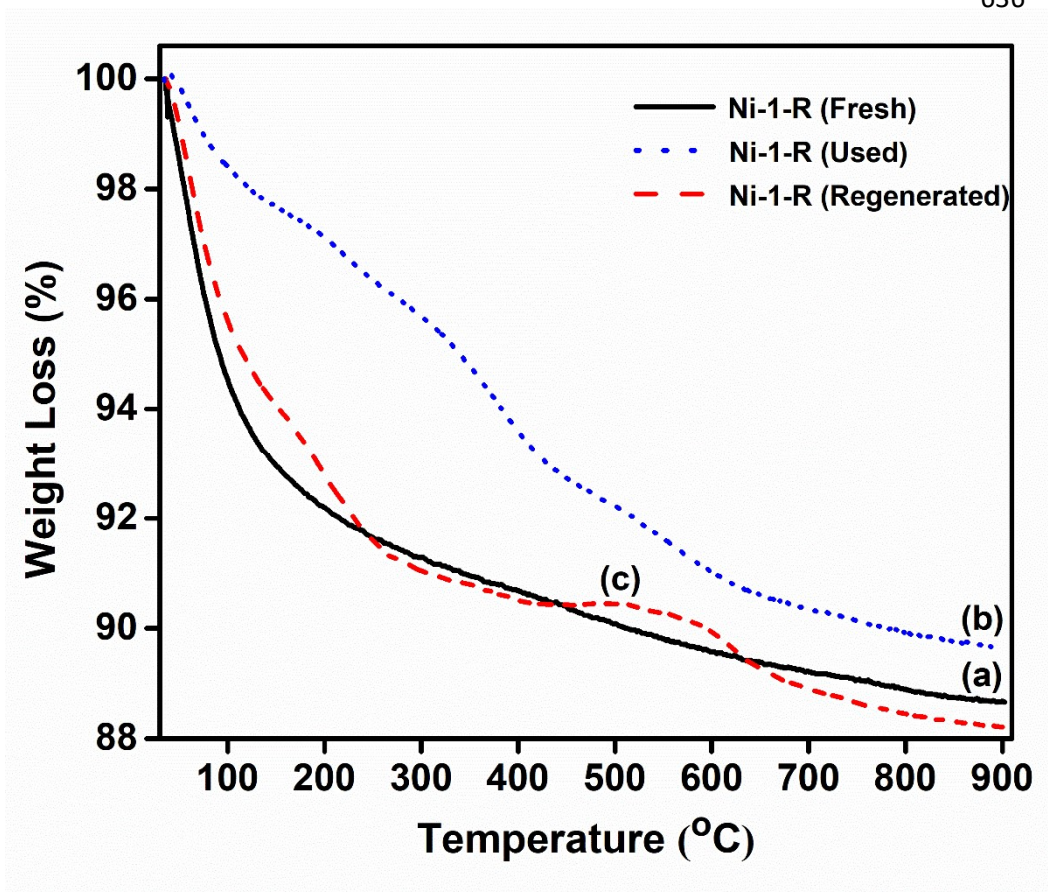

648

649

650

651

652 Fig. S26. TGA Profile of (a) Fresh Ni-ITQ-2 composite, (b) Used Ni-ITQ-2 composite, and (c)  
653 regenerated Ni-ITQ-2 composite.

654

655

656

657

658  
659  
660  
661  
662  
663  
664  
665  
666  
667  
668  
669  
670  
671  
672  
673  
674  
675  
676  
677  
678  
679  
680  
681  
682  
683

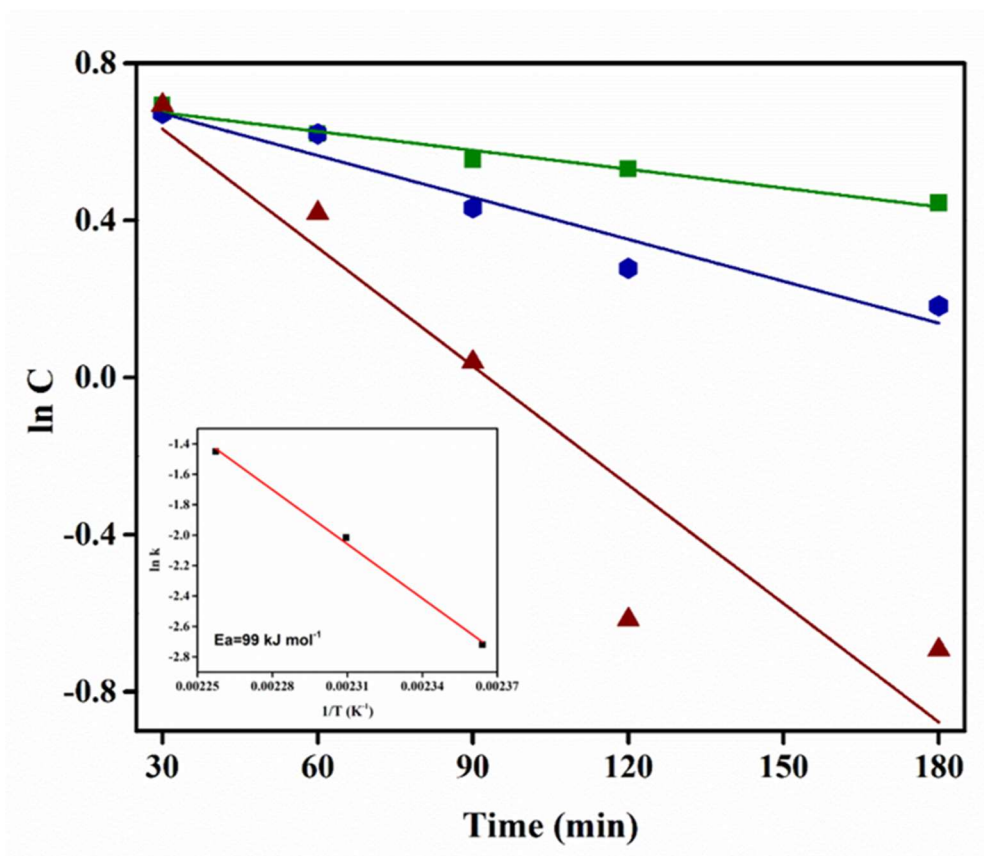

Fig. S27. The concentration of *m*-cresol as a function of time at various reaction temperature over Ni-ITQ-2 composite, and the inset figure showed the Arrhenius plot derived from kinetics data.



684  
685  
686  
687  
688  
689  
690  
691  
692  
693  
694  
695  
696  
697  
698  
699  
700  
701  
702  
703  
704  
705  
706  
707  
708  
709  
710  
711  
712  
713  
714

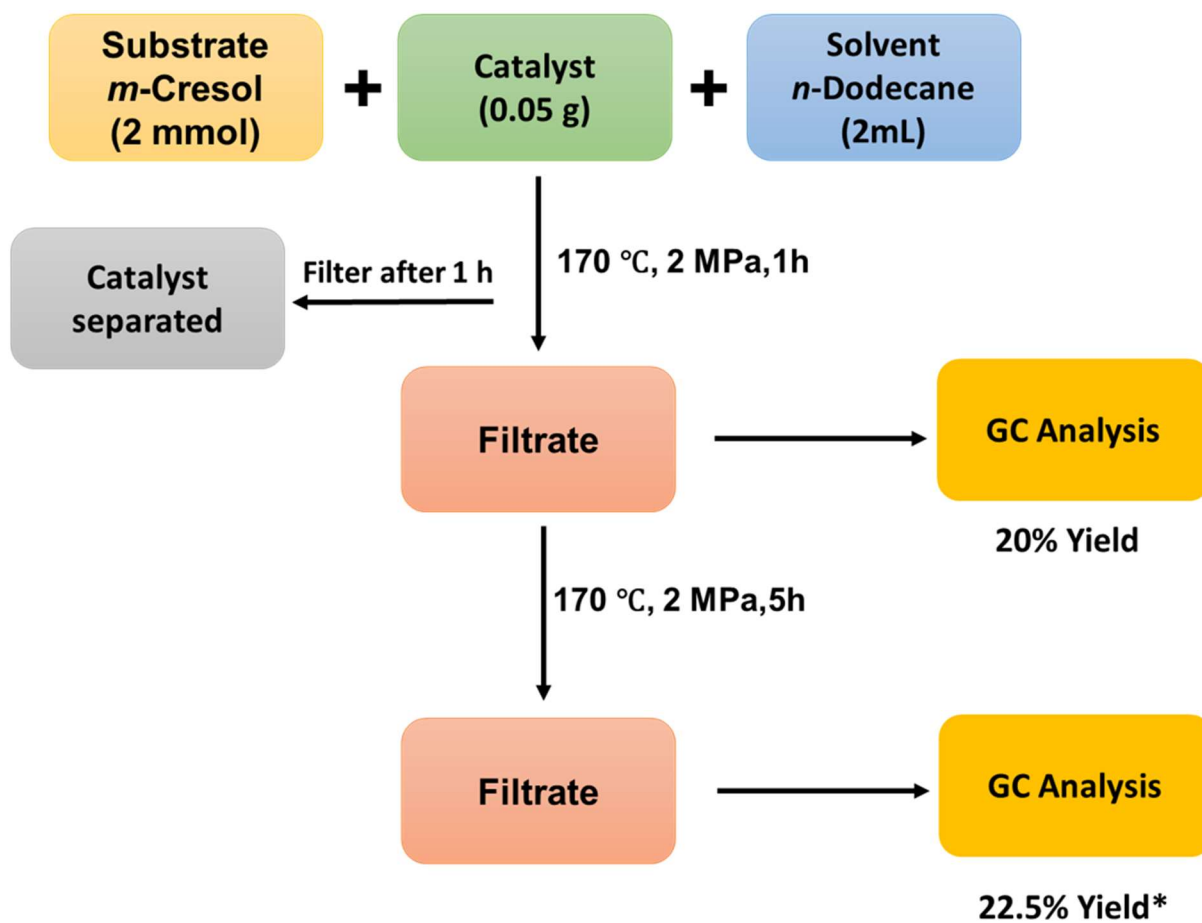

(\*:Original yield = 20%, Yield after quenching studies = 22.5%. Therefore, the yield due to activity in filtrate solution = 2.5%)

Fig. S28. Scheme representation for the hot filtration test.

715  
716  
717  
718  
719

Table S3: N<sub>2</sub> Sorption analysis summary of Ni-ITQ-2 composite.

| Catalyst                      | Surface Area (m <sup>2</sup> /g) | Pore Volume (cm <sup>3</sup> /g) |
|-------------------------------|----------------------------------|----------------------------------|
|                               | BET                              | BJH                              |
| MS-1                          | 380                              | 0.43                             |
| ITQ-2                         | 409                              | 0.21                             |
| Ni (No pH adjustment, 4 mmol) | 332                              | 0.47                             |
| Ni (pH=4, 4 mmol)             | 355                              | 0.56                             |
| Ni (pH=2, 4 mmol)             | 363                              | 0.39                             |
| Ni (pH=2, 2 mmol)             | 388                              | 0.62                             |
| Ni (pH=2, 1 mmol)             | 444                              | 0.36                             |

720  
721  
722  
723  
724  
725  
726  
727  
728  
729

Table S4. Hydro-treating of various aromatic substrates on Ni-ITQ-2 composite catalyst.

| Substrate                                                                           | % Conversion | Major Product                                                                        | Turnover Number |
|-------------------------------------------------------------------------------------|--------------|--------------------------------------------------------------------------------------|-----------------|
| 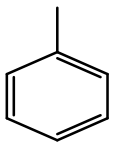   | 98           |    | 36              |
|    | 54           |    | 20              |
|    | 79           |    | 29              |
|    | 100          |    | 36              |
|   | 81           |   | 29              |
|  | 54           |  | 20              |
|  | 98           |  | 36              |
|  | 40           |  | 15              |
|  | 100          |  | 36              |

732

733 **References**

- 734 1 R.V. Jasra, J. Das, A. Unnikrishnan and A. Sakthivel, 2016, US Patent 9359216B2  
735 2 Spectral Database for Organic Compounds,  
736 [https://sdfs.db.aist.go.jp/sdfs/cgibin/cre\\_index.cgi](https://sdfs.db.aist.go.jp/sdfs/cgibin/cre_index.cgi) (accessed October 30)  
737
